# Supplementary material
Source: MDPI journal article supplement (https://www.mdpi.com/2673-4591/56/1/191)
Supplement: s1 [file s1]

**Table S1.** Comparative performance of top-performing FDA-approved drugs as potential inhibitors of the RBD of SARS-CoV-2 variants.

| Drug                    | DrugBank Database ID | Docking Score (%) |         |         |       |       |           |
|-------------------------|----------------------|-------------------|---------|---------|-------|-------|-----------|
|                         |                      | Wild              | B.1.1.7 | B.1.351 | P.1   | Mean  | Std. Dev. |
| Carboprost tromethamine | DB00429              | 91.36             | 92.63   | 92.77   | 92.25 | 92.25 | 0.63      |
| Bimatoprost             | DB00905              | 91.51             | 92.26   | 92.14   | 93.10 | 92.25 | 0.65      |
| Salmeterol              | DB00938              | 92.94             | 92.17   | 91.98   | 91.89 | 92.25 | 0.48      |
| Latanoprost             | DB00654              | 92.08             | 92.50   | 91.07   | 92.72 | 92.09 | 0.73      |
| Alprostadil             | DB00770              | 90.88             | 92.37   | 92.15   | 92.46 | 91.97 | 0.73      |
| Tafluprost              | DB08819              | 91.60             | 92.28   | 91.77   | 92.12 | 91.94 | 0.31      |
| Mupirocin               | DB00410              | 90.92             | 91.25   | 92.94   | 92.55 | 91.92 | 0.98      |
| Vilanterol              | DB09082              | 92.63             | 91.65   | 91.82   | 91.52 | 91.91 | 0.50      |
| Dinoprost               | DB12789              | 91.18             | 92.00   | 91.92   | 92.45 | 91.89 | 0.53      |
| Dinoprost tromethamine  | DB01160              | 91.80             | 91.71   | 91.57   | 91.63 | 91.68 | 0.10      |
| Dinoprostone            | DB00917              | 90.45             | 92.02   | 92.01   | 92.13 | 91.65 | 0.80      |
| Dopexamine              | DB12313              | 91.80             | 91.74   | 90.64   | 92.09 | 91.57 | 0.64      |
| Netarsudil              | DB13931              | 92.64             | 90.80   | 91.40   | 91.24 | 91.52 | 0.79      |
| Mirabegron              | DB08893              | 92.08             | 91.74   | 91.05   | 91.18 | 91.51 | 0.48      |
| Oxetacaine              | DB12532              | 90.89             | 91.84   | 91.87   | 91.31 | 91.48 | 0.47      |
| Zofenopril              | DB13166              | 90.55             | 91.52   | 91.60   | 91.72 | 91.35 | 0.54      |
| Treprostinil            | DB00374              | 90.39             | 91.52   | 91.43   | 91.95 | 91.32 | 0.66      |
| Silodosin               | DB06207              | 91.81             | 90.46   | 91.51   | 91.49 | 91.32 | 0.59      |
| Lisinopril              | DB00722              | 90.35             | 92.18   | 91.06   | 91.67 | 91.32 | 0.79      |
| Avapritinib             | DB15233              | 91.56             | 91.08   | 91.25   | 91.35 | 91.31 | 0.20      |
| Acidinium               | DB08897              | 90.44             | 91.57   | 92.02   | 90.99 | 91.26 | 0.69      |
| Quinapril               | DB00881              | 90.97             | 90.98   | 91.73   | 91.31 | 91.25 | 0.36      |
| Vilazodone              | DB06684              | 91.22             | 91.12   | 91.08   | 91.55 | 91.24 | 0.21      |
| Propafenone             | DB01182              | 91.21             | 91.13   | 91.13   | 91.20 | 91.17 | 0.04      |
| Tirbanibulin            | DB06137              | 90.77             | 91.21   | 91.34   | 91.30 | 91.16 | 0.26      |
| Vibegron                | DB14895              | 91.48             | 91.10   | 90.98   | 91.06 | 91.16 | 0.22      |
| Eliglustat              | DB09039              | 91.44             | 90.32   | 91.43   | 91.30 | 91.12 | 0.54      |
| Labetalol               | DB00598              | 91.22             | 91.37   | 90.81   | 91.04 | 91.11 | 0.24      |
| Panobinostat            | DB06603              | 90.58             | 90.85   | 91.71   | 91.17 | 91.08 | 0.49      |
| Oxyphenonium            | DB00219              | 90.49             | 91.15   | 91.40   | 91.19 | 91.06 | 0.39      |

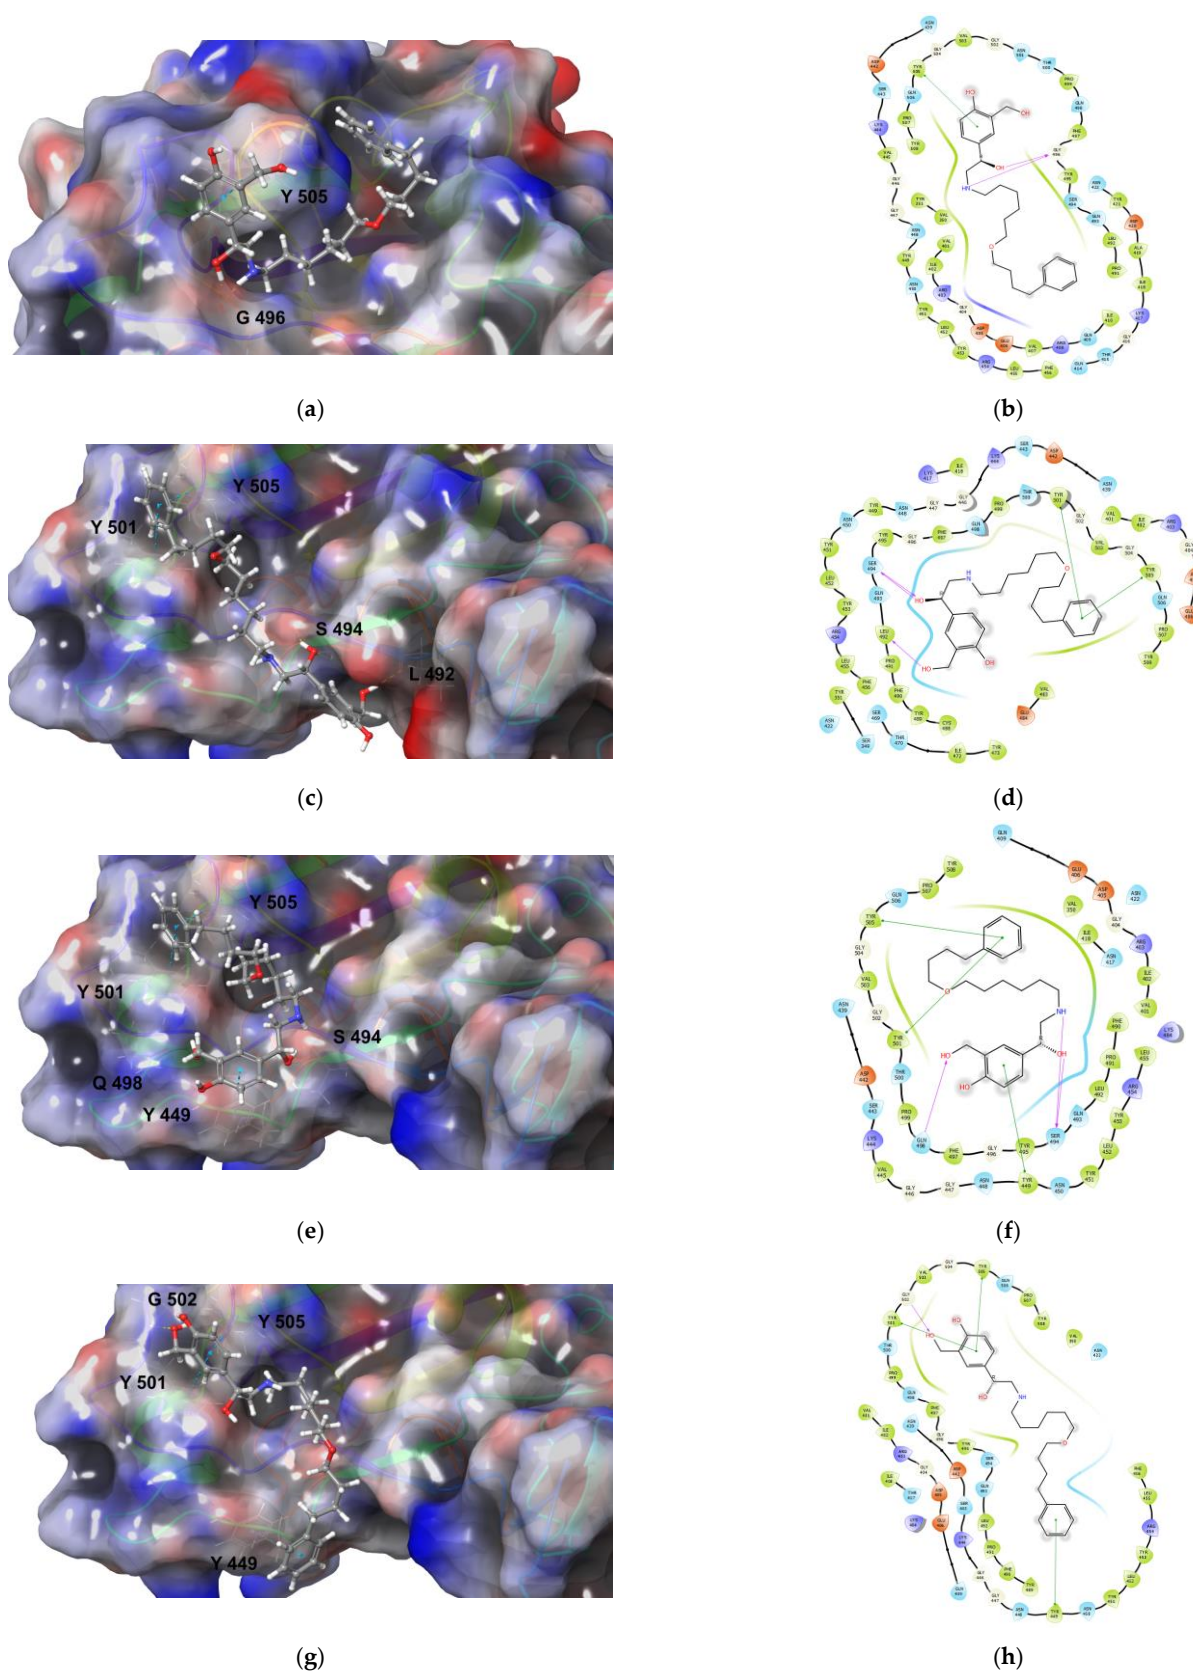

**Figure S1.** Structures of Salmeterol, the top-performing FDA-approved drug, docked in the RBD of SARS-CoV-2 and their corresponding ligand interaction diagrams: (a–b) Wild type; (c–d) B.1.1.7 variant; (e–f) B.1.351 variant; and (g–h) P.1 variant.

**Table S2.** ADMET properties of top-performing FDA-approved drugs as potential inhibitors of the RBD of SARS-CoV-2 variants (Green: excellent; Yellow: medium; Red: poor).

| Drug                         | Physicochemical Properties                         |                                                         |                                       |                                          |                                           |                                                  |                                                                |
|------------------------------|----------------------------------------------------|---------------------------------------------------------|---------------------------------------|------------------------------------------|-------------------------------------------|--------------------------------------------------|----------------------------------------------------------------|
|                              | Molar Mass<br>(g mol <sup>-1</sup> )               | Topological-<br>Polar Surface<br>Area (Å <sup>2</sup> ) | No. of Hydro-<br>gen Bond Do-<br>nors | No. of Hydro-<br>gen Bond Ac-<br>ceptors | LogS (Solubil-<br>ity, mol/L)             | LogP (Distri-<br>bution Coeffi-<br>cient, mol/L) | LogD <sub>7.4</sub><br>(Distribution<br>Coefficient,<br>mol/L) |
| Carboprost tro-<br>methamine | 368.26                                             | 97.99                                                   | 5                                     | 4                                        | -3.429                                    | 2.433                                            | 1.856                                                          |
| Bimatoprost                  | 415.27                                             | 89.79                                                   | 5                                     | 4                                        | -3.968                                    | 1.873                                            | 2.398                                                          |
| Salmeterol                   | 415.27                                             | 81.95                                                   | 5                                     | 4                                        | -2.920                                    | 3.052                                            | 3.040                                                          |
| Latanoprost                  | 432.29                                             | 86.99                                                   | 5                                     | 3                                        | -4.722                                    | 3.483                                            | 3.466                                                          |
| Alprostadil                  | 354.24                                             | 94.83                                                   | 5                                     | 3                                        | -3.755                                    | 3.072                                            | 1.992                                                          |
| Tafluprost                   | 452.24                                             | 75.99                                                   | 5                                     | 2                                        | -4.693                                    | 3.744                                            | 4.028                                                          |
| Mupirocin                    | 500.3                                              | 146.05                                                  | 9                                     | 4                                        | -3.155                                    | 2.744                                            | 1.620                                                          |
| Vilanterol                   | 485.17                                             | 91.18                                                   | 6                                     | 4                                        | -3.633                                    | 3.009                                            | 3.040                                                          |
| Dinoprost                    | 354.24                                             | 97.99                                                   | 5                                     | 4                                        | -3.607                                    | 2.200                                            | 1.630                                                          |
| Dinoprost trometham-<br>ine  | 354.24                                             | 97.99                                                   | 5                                     | 4                                        | -3.607                                    | 2.200                                            | 1.630                                                          |
| Dinoprostone                 | 352.22                                             | 94.83                                                   | 5                                     | 3                                        | -3.819                                    | 1.844                                            | 0.970                                                          |
| Dopexamine                   | 356.25                                             | 64.52                                                   | 4                                     | 4                                        | -2.406                                    | 2.542                                            | 3.117                                                          |
| Netarsudil                   | 453.21                                             | 94.31                                                   | 6                                     | 3                                        | -3.866                                    | 4.311                                            | 3.433                                                          |
| Mirabegron                   | 396.16                                             | 101                                                     | 6                                     | 5                                        | -2.888                                    | 1.183                                            | 1.209                                                          |
| Oxetacaine                   | 467.31                                             | 64.09                                                   | 6                                     | 1                                        | -2.874                                    | 3.818                                            | 3.187                                                          |
| Zofenopril                   | 429.11                                             | 74.68                                                   | 5                                     | 1                                        | -4.739                                    | 4.009                                            | 3.602                                                          |
| Treprostinil                 | 390.24                                             | 86.99                                                   | 5                                     | 3                                        | -4.428                                    | 4.334                                            | 3.486                                                          |
| Silodosin                    | 495.23                                             | 97.05                                                   | 7                                     | 4                                        | -4.951                                    | 3.368                                            | 3.084                                                          |
| Lisinopril                   | 405.23                                             | 132.96                                                  | 8                                     | 5                                        | -1.702                                    | -1.535                                           | -0.435                                                         |
| Avapritinib                  | 498.24                                             | 106.29                                                  | 10                                    | 2                                        | -4.261                                    | 3.642                                            | 2.473                                                          |
| Acidinium                    | 484.16                                             | 55.76                                                   | 5                                     | 1                                        | -1.118                                    | 4.030                                            | 2.506                                                          |
| Quinapril                    | 438.22                                             | 95.94                                                   | 7                                     | 2                                        | -2.867                                    | 3.038                                            | 2.207                                                          |
| Vilazodone                   | 441.22                                             | 102.29                                                  | 7                                     | 3                                        | -5.027                                    | 4.082                                            | 3.259                                                          |
| Propafenone                  | 341.2                                              | 58.56                                                   | 4                                     | 2                                        | -4.058                                    | 3.423                                            | 3.384                                                          |
| Tirbanibulin                 | 431.22                                             | 63.69                                                   | 6                                     | 1                                        | -3.944                                    | 2.982                                            | 3.015                                                          |
| Vibegron                     | 444.22                                             | 96.25                                                   | 7                                     | 3                                        | -2.141                                    | 0.637                                            | 1.810                                                          |
| Eliglustat                   | 404.27                                             | 71.03                                                   | 6                                     | 2                                        | -3.670                                    | 3.356                                            | 3.179                                                          |
| Labetalol                    | 328.18                                             | 95.58                                                   | 5                                     | 5                                        | -3.213                                    | 2.358                                            | 1.898                                                          |
| Panobinostat                 | 349.18                                             | 80.64                                                   | 5                                     | 4                                        | -3.557                                    | 2.727                                            | 1.828                                                          |
| Oxyphenonium                 | 348.25                                             | 46.53                                                   | 4                                     | 1                                        | 0.137                                     | 2.940                                            | 1.991                                                          |
| Drug                         | Absorption                                         |                                                         |                                       | Distribution                             |                                           |                                                  | Excretion                                                      |
|                              | LogP <sub>app</sub> (Caco-<br>2 Permeabil-<br>ity) | LogP <sub>app</sub><br>(MDCK<br>Permeability)           | Plasma Pro-<br>tein Binding<br>(%)    | Volume Dis-<br>tribution<br>(L/kg)       | Blood-Brain<br>Barrier (Proba-<br>bility) | % Unbound in<br>Plasma                           | Clearance<br>(mL/min/kg)                                       |
| Carboprost tro-<br>methamine | -5.592                                             | 7.15 × 10 <sup>-5</sup>                                 | 87.859                                | 0.389                                    | 0.026                                     | 7.055                                            | 4.598                                                          |
| Bimatoprost                  | -5.175                                             | 3.58 × 10 <sup>-5</sup>                                 | 88.984                                | 0.678                                    | 0.043                                     | 3.488                                            | 6.573                                                          |
| Salmeterol                   | -5.024                                             | 2.93 × 10 <sup>-5</sup>                                 | 86.638                                | 1.902                                    | 0.249                                     | 14.482                                           | 10.893                                                         |
| Latanoprost                  | -5.006                                             | 1.58 × 10 <sup>-4</sup>                                 | 95.468                                | 0.978                                    | 0.035                                     | 2.545                                            | 9.674                                                          |
| Alprostadil                  | -5.306                                             | 3.63 × 10 <sup>-5</sup>                                 | 86.320                                | 0.408                                    | 0.064                                     | 2.761                                            | 4.441                                                          |
| Tafluprost                   | -4.817                                             | 2.07 × 10 <sup>-5</sup>                                 | 99.519                                | 0.911                                    | 0.031                                     | 1.487                                            | 5.745                                                          |
| Mupirocin                    | -5.436                                             | 4.15 × 10 <sup>-5</sup>                                 | 88.051                                | 0.431                                    | 0.124                                     | 9.402                                            | 3.481                                                          |
| Vilanterol                   | -5.556                                             | 3.55 × 10 <sup>-5</sup>                                 | 90.476                                | 1.657                                    | 0.188                                     | 5.704                                            | 7.424                                                          |
| Dinoprost                    | -5.604                                             | 5.20 × 10 <sup>-5</sup>                                 | 87.130                                | 0.335                                    | 0.022                                     | 5.243                                            | 3.856                                                          |
| Dinoprost trometham-<br>ine  | -5.604                                             | 5.20 × 10 <sup>-5</sup>                                 | 87.130                                | 0.335                                    | 0.022                                     | 5.243                                            | 3.856                                                          |
| Dinoprostone                 | -5.476                                             | 4.62 × 10 <sup>-5</sup>                                 | 83.662                                | 0.320                                    | 0.006                                     | 5.707                                            | 4.801                                                          |

|              |        |                       |        |       |       |        |        |
|--------------|--------|-----------------------|--------|-------|-------|--------|--------|
| Dopexamine   | -5.818 | $1.26 \times 10^{-5}$ | 73.172 | 1.241 | 0.208 | 34.185 | 14.033 |
| Netarsudil   | -5.273 | $8.79 \times 10^{-6}$ | 96.563 | 2.592 | 0.794 | 2.539  | 8.793  |
| Mirabegron   | -5.936 | $1.04 \times 10^{-5}$ | 55.901 | 2.485 | 0.489 | 49.057 | 6.503  |
| Oxetacaine   | -4.860 | $4.05 \times 10^{-5}$ | 78.662 | 0.814 | 0.393 | 24.293 | 10.163 |
| Zofenopril   | -5.430 | $1.32 \times 10^{-5}$ | 97.900 | 0.176 | 0.212 | 0.595  | 6.476  |
| Treprostinil | -5.235 | $5.48 \times 10^{-6}$ | 96.155 | 0.257 | 0.087 | 4.004  | 11.490 |
| Silodosin    | -5.292 | $1.16 \times 10^{-5}$ | 75.921 | 2.633 | 0.056 | 9.936  | 5.471  |
| Lisinopril   | -6.194 | $8.06 \times 10^{-5}$ | 19.629 | 0.494 | 0.159 | 62.438 | 1.159  |
| Avapritinib  | -5.132 | $2.25 \times 10^{-5}$ | 91.676 | 2.532 | 0.387 | 11.821 | 8.594  |
| Acidinium    | -5.167 | $7.14 \times 10^{-5}$ | 94.170 | 1.253 | 0.241 | 1.397  | 2.284  |
| Quinapril    | -5.791 | $3.65 \times 10^{-5}$ | 94.054 | 0.277 | 0.073 | 8.943  | 1.676  |
| Vilazodone   | -5.177 | $1.28 \times 10^{-5}$ | 95.880 | 2.424 | 0.573 | 6.176  | 6.247  |
| Propafenone  | -5.023 | $2.12 \times 10^{-5}$ | 89.554 | 1.836 | 0.365 | 6.210  | 12.604 |
| Tirbanibulin | -4.715 | $2.38 \times 10^{-5}$ | 95.752 | 2.174 | 0.805 | 5.522  | 11.273 |
| Vibegron     | -5.430 | $6.12 \times 10^{-6}$ | 70.478 | 2.544 | 0.527 | 32.896 | 1.644  |
| Eliglustat   | -5.053 | $3.79 \times 10^{-5}$ | 81.864 | 1.806 | 0.738 | 11.390 | 6.663  |
| Labetalol    | -5.439 | $6.69 \times 10^{-6}$ | 74.952 | 4.114 | 0.101 | 43.445 | 13.381 |
| Panobinostat | -5.283 | $6.00 \times 10^{-6}$ | 85.303 | 0.698 | 0.271 | 10.724 | 1.537  |
| Oxyphenonium | -5.329 | $1.03 \times 10^{-4}$ | 84.090 | 0.822 | 0.154 | 13.468 | 9.649  |

| Drug                    | Metabolism                      |                                 | hERG Blocker<br>(Probability) | Toxicity                              |                                    |
|-------------------------|---------------------------------|---------------------------------|-------------------------------|---------------------------------------|------------------------------------|
|                         | Cytochrome 450<br>Inhibitor     | Cytochrome 450<br>Substrate     |                               | Human Hepatotoxicity<br>(Probability) | Ames Mutagenicity<br>(Probability) |
| Carboprost tromethamine |                                 | CYP2C9                          | 0.042                         | 0.278                                 | 0.005                              |
| Bimatoprost             |                                 | CYP2C19, CYP2C9                 | 0.301                         | 0.303                                 | 0.013                              |
| Salmeterol              | CYP2D6                          |                                 | 0.510                         | 0.489                                 | 0.105                              |
| Latanoprost             |                                 | CYP2C9                          | 0.536                         | 0.515                                 | 0.010                              |
| Alprostadil             |                                 | CYP1A2, CYP2C19, CYP2C9         | 0.025                         | 0.292                                 | 0.011                              |
| Tafluprost              | CYP2C19, CYP2C9                 | CYP2C9                          | 0.618                         | 0.636                                 | 0.048                              |
| Mupirocin               |                                 | CYP2C9                          | 0.101                         | 0.101                                 | 0.050                              |
| Vilanterol              | CYP2D6, CYP3A4                  |                                 | 0.519                         | 0.712                                 | 0.090                              |
| Dinoprost               |                                 | CYP2C9                          | 0.045                         | 0.312                                 | 0.008                              |
| Dinoprost tromethamine  |                                 | CYP2C9                          | 0.045                         | 0.312                                 | 0.008                              |
| Dinoprostone            |                                 | CYP1A2, CYP2C9                  | 0.025                         | 0.207                                 | 0.007                              |
| Dopexamine              | CYP2D6                          | CYP2D6, CYP3A4                  | 0.717                         | 0.357                                 | 0.341                              |
| Netarsudil              | CYP2C19, CYP2C9, CYP2D6, CYP3A4 | CYP1A2, CYP2D6, CYP3A4          | 0.921                         | 0.790                                 | 0.796                              |
| Mirabegron              |                                 | CYP3A4                          | 0.875                         | 0.947                                 | 0.430                              |
| Oxetacaine              | CYP2C19, CYP2D6, CYP3A4         | CYP2C19, CYP3A4                 | 0.049                         | 0.097                                 | 0.009                              |
| Zofenopril              |                                 | CYP2C9                          | 0.032                         | 0.872                                 | 0.004                              |
| Treprostinil            |                                 | CYP2C9                          | 0.149                         | 0.311                                 | 0.007                              |
| Silodosin               | CYP2D6                          | CYP2D6, CYP3A4                  | 0.871                         | 0.957                                 | 0.074                              |
| Lisinopril              |                                 |                                 | 0.036                         | 0.977                                 | 0.004                              |
| Avapritinib             | CYP2C19                         | CYP3A4                          | 0.800                         | 0.898                                 | 0.231                              |
| Acidinium               | CYP2D6                          | CYP2D6, CYP3A4                  | 0.652                         | 0.782                                 | 0.020                              |
| Quinapril               |                                 |                                 | 0.133                         | 0.968                                 | 0.003                              |
| Vilazodone              |                                 | CYP1A2, CYP2D6                  | 0.987                         | 0.943                                 | 0.418                              |
| Propafenone             | CYP1A2, CYP2D6                  | CYP2C19, CYP2D6                 | 0.920                         | 0.582                                 | 0.215                              |
| Tirbanibulin            | CYP2C19, CYP2C9, CYP2D6, CYP3A4 | CYP2D6                          | 0.925                         | 0.497                                 | 0.178                              |
| Vibegron                |                                 | CYP3A4                          | 0.786                         | 0.954                                 | 0.029                              |
| Eliglustat              | CYP2D6, CYP3A4                  | CYP1A2, CYP2C19, CYP2D6, CYP3A4 | 0.940                         | 0.059                                 | 0.019                              |

| Labetalol                    | CYP2D6                           | CYP2D6                                       | 0.592                  | 0.478                              | 0.018        |                                    |
|------------------------------|----------------------------------|----------------------------------------------|------------------------|------------------------------------|--------------|------------------------------------|
| Panobinostat                 |                                  | CYP2C9, CYP2D6                               | 0.735                  | 0.997                              | 0.991        |                                    |
| Oxyphenonium                 | CYP2D6                           |                                              | 0.237                  | 0.018                              | 0.010        |                                    |
| Drug                         | Toxicity                         |                                              | Drug-likeness          |                                    |              |                                    |
|                              | Carcinogenicity<br>(Probability) | Respiratory Tox-<br>icity (Probabil-<br>ity) | Drug-likeness<br>Score | Synthetic Acces-<br>sibility Score | MCE-18 Score | Natural Product-<br>likeness Score |
| Carboprost tro-<br>methamine | 0.050                            | 0.861                                        | 0.312                  | 4.140                              | 24.973       | 1.887                              |
| Bimatoprost                  | 0.028                            | 0.678                                        | 0.312                  | 3.871                              | 42.333       | 1.012                              |
| Salmeterol                   | 0.020                            | 0.385                                        | 0.310                  | 2.720                              | 22.000       | 0.201                              |
| Latanoprost                  | 0.114                            | 0.337                                        | 0.247                  | 3.855                              | 45.256       | 1.176                              |
| Alprostadil                  | 0.073                            | 0.431                                        | 0.348                  | 3.672                              | 20.000       | 1.698                              |
| Tafluprost                   | 0.115                            | 0.917                                        | 0.274                  | 4.008                              | 52.103       | 0.580                              |
| Mupirocin                    | 0.318                            | 0.951                                        | 0.109                  | 4.606                              | 38.958       | 1.702                              |
| Vilanterol                   | 0.034                            | 0.148                                        | 0.259                  | 2.980                              | 26.000       | -0.169                             |
| Dinoprost                    | 0.067                            | 0.844                                        | 0.319                  | 3.979                              | 20.571       | 1.936                              |
| Dinoprost trometham-<br>ine  | 0.067                            | 0.844                                        | 0.319                  | 3.979                              | 20.571       | 1.936                              |
| Dinoprostone                 | 0.184                            | 0.431                                        | 0.370                  | 3.874                              | 20.118       | 2.028                              |
| Dopexamine                   | 0.013                            | 0.759                                        | 0.327                  | 2.055                              | 10.000       | 0.229                              |
| Netarsudil                   | 0.078                            | 0.830                                        | 0.389                  | 2.768                              | 46.000       | -0.930                             |
| Mirabegron                   | 0.034                            | 0.719                                        | 0.359                  | 3.014                              | 32.000       | -0.943                             |
| Oxetacaine                   | 0.052                            | 0.004                                        | 0.521                  | 2.874                              | 19.000       | -0.482                             |
| Zofenopril                   | 0.818                            | 0.204                                        | 0.716                  | 3.436                              | 58.966       | -0.378                             |
| Treprostinil                 | 0.310                            | 0.818                                        | 0.532                  | 3.870                              | 60.462       | 1.335                              |
| Silodosin                    | 0.075                            | 0.816                                        | 0.370                  | 3.216                              | 65.270       | -0.832                             |
| Lisinopril                   | 0.017                            | 0.361                                        | 0.384                  | 3.172                              | 45.394       | 0.201                              |
| Avapritinib                  | 0.957                            | 0.451                                        | 0.394                  | 3.455                              | 107.000      | -1.684                             |
| Aclidinium                   | 0.031                            | 0.939                                        | 0.273                  | 4.216                              | 91.216       | -0.042                             |
| Quinapril                    | 0.014                            | 0.038                                        | 0.584                  | 3.227                              | 60.257       | -0.319                             |
| Vilazodone                   | 0.228                            | 0.981                                        | 0.422                  | 2.597                              | 58.118       | -1.199                             |
| Propafenone                  | 0.103                            | 0.138                                        | 0.487                  | 2.389                              | 22.000       | -0.363                             |
| Tirbanibulin                 | 0.072                            | 0.164                                        | 0.563                  | 2.112                              | 42.471       | -1.486                             |
| Vibegron                     | 0.128                            | 0.905                                        | 0.543                  | 3.839                              | 88.400       | -0.249                             |
| Eliglustat                   | 0.080                            | 0.939                                        | 0.553                  | 3.071                              | 52.923       | -0.220                             |
| Labetalol                    | 0.028                            | 0.517                                        | 0.597                  | 2.809                              | 26.000       | -0.207                             |
| Panobinostat                 | 0.956                            | 0.912                                        | 0.170                  | 2.536                              | 16.000       | -0.527                             |
| Oxyphenonium                 | 0.016                            | 0.884                                        | 0.578                  | 3.116                              | 50.143       | 0.087                              |

**Table S3.** Comparative performance of top-performing investigational drugs as potential inhibitors of the RBD of SARS-CoV-2 variants.

| DrugBank Database ID | Docking Score (%) |         |         |       |       |           |
|----------------------|-------------------|---------|---------|-------|-------|-----------|
|                      | Wild              | B.1.1.7 | B.1.351 | P.1   | Mean  | Std. Dev. |
| DB15106              | 91.99             | 92.90   | 92.65   | 92.86 | 92.60 | 0.42      |
| DB12100              | 92.42             | 92.42   | 91.99   | 91.59 | 92.11 | 0.40      |
| DB12133              | 91.84             | 92.90   | 92.24   | 91.26 | 92.06 | 0.69      |
| DB11858              | 91.18             | 92.99   | 92.01   | 91.58 | 91.94 | 0.78      |
| DB12511              | 91.17             | 91.51   | 92.39   | 92.20 | 91.82 | 0.57      |
| DB15321              | 92.05             | 91.33   | 91.89   | 91.96 | 91.81 | 0.32      |
| DB12259              | 90.76             | 91.82   | 92.82   | 91.56 | 91.74 | 0.85      |
| DB16315              | 91.67             | 91.70   | 91.68   | 91.71 | 91.69 | 0.02      |
| DB12708              | 91.43             | 92.46   | 91.49   | 91.26 | 91.66 | 0.54      |
| DB12013              | 91.56             | 91.31   | 91.82   | 91.73 | 91.61 | 0.22      |
| DB12022              | 89.96             | 91.99   | 92.14   | 92.29 | 91.60 | 1.10      |
| DB11818              | 91.25             | 91.59   | 91.60   | 91.73 | 91.54 | 0.21      |
| DB15410              | 90.79             | 91.89   | 91.74   | 91.56 | 91.50 | 0.49      |
| DB11781              | 90.24             | 91.96   | 91.98   | 91.75 | 91.48 | 0.83      |
| DB05104              | 90.19             | 92.03   | 91.97   | 91.70 | 91.47 | 0.87      |
| DB05562              | 91.13             | 91.54   | 91.64   | 91.56 | 91.47 | 0.23      |
| DB12961              | 91.45             | 91.37   | 90.97   | 91.92 | 91.43 | 0.39      |
| DB12109              | 90.58             | 92.23   | 91.45   | 91.35 | 91.40 | 0.67      |
| DB15048              | 91.47             | 91.06   | 91.46   | 91.61 | 91.40 | 0.24      |
| DB12408              | 90.57             | 91.39   | 91.73   | 91.90 | 91.40 | 0.59      |
| DB12985              | 90.74             | 91.62   | 90.40   | 92.83 | 91.40 | 1.08      |
| DB13312              | 91.28             | 91.07   | 91.63   | 91.59 | 91.39 | 0.27      |
| DB02056              | 91.33             | 91.52   | 91.39   | 91.15 | 91.35 | 0.15      |
| DB12043              | 90.69             | 91.61   | 91.72   | 91.37 | 91.35 | 0.46      |
| DB12848              | 90.48             | 91.42   | 91.68   | 91.70 | 91.32 | 0.57      |
| DB05713              | 91.49             | 91.11   | 91.45   | 91.17 | 91.31 | 0.19      |
| DB09211              | 90.93             | 91.40   | 91.31   | 91.57 | 91.30 | 0.27      |
| DB15419              | 91.21             | 91.47   | 90.31   | 92.19 | 91.30 | 0.78      |
| DB05590              | 90.63             | 91.29   | 91.59   | 91.65 | 91.29 | 0.47      |
| DB15212              | 91.70             | 90.71   | 91.27   | 91.43 | 91.28 | 0.42      |



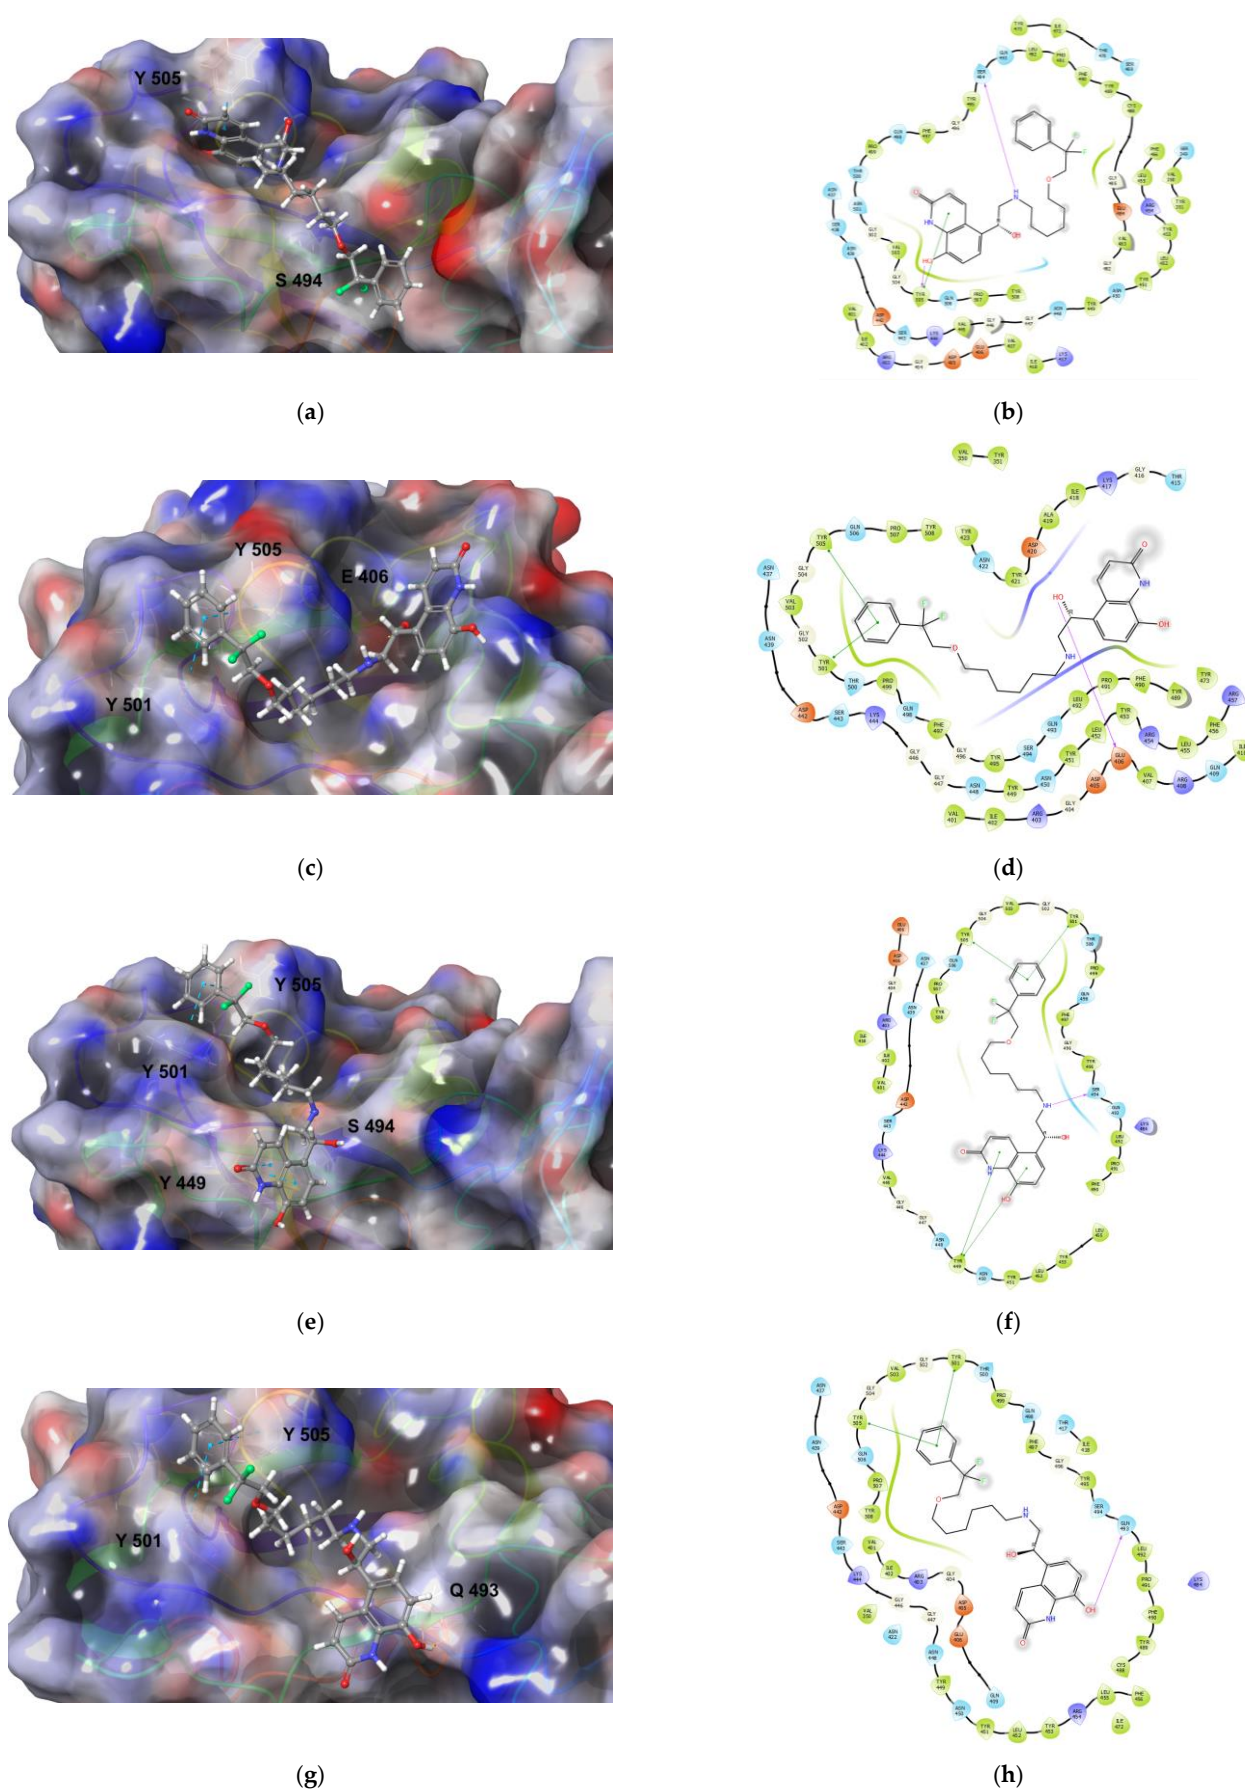

**Figure S2.** Structures of Abediterol, the top-performing investigational drug, docked in the RBD of SARS-CoV-2 and their corresponding ligand interaction diagrams: (a–b) Wild type; (c–d) B.1.1.7 variant; (e–f) B.1.351 variant; and (g–h) P.1 variant.

**Table S4.** ADMET properties of top-performing investigational drugs as potential inhibitors of the RBD of SARS-CoV-2 variants (Green: excellent; Yellow: medium; Red: poor).

| DrugBank Database ID | Physicochemical Properties                           |                                                         |                                       |                                          |                                           |                                                | LogD <sub>7.4</sub><br>(Distribution Coefficient, mol/L) |
|----------------------|------------------------------------------------------|---------------------------------------------------------|---------------------------------------|------------------------------------------|-------------------------------------------|------------------------------------------------|----------------------------------------------------------|
|                      | Molar Mass<br>(g mol <sup>-1</sup> )                 | Topological-<br>Polar Surface<br>Area (Å <sup>2</sup> ) | No. of Hydro-<br>gen Bond Do-<br>nors | No. of Hydro-<br>gen Bond Ac-<br>ceptors | LogS (Solubil-<br>ity, mol/L)             | LogP (Distrib-<br>ution Coefficient,<br>mol/L) |                                                          |
| DB15106              | 480.19                                               | 115.47                                                  | 9                                     | 3                                        | -3.481                                    | 3.233                                          | 2.979                                                    |
| DB12100              | 460.22                                               | 94.58                                                   | 6                                     | 4                                        | -4.279                                    | 3.475                                          | 3.192                                                    |
| DB12133              | 376.22                                               | 97.99                                                   | 5                                     | 4                                        | -3.880                                    | 3.065                                          | 1.530                                                    |
| DB11858              | 496.26                                               | 149.95                                                  | 8                                     | 6                                        | -3.002                                    | -0.501                                         | -0.092                                                   |
| DB12511              | 470.18                                               | 94.15                                                   | 7                                     | 1                                        | -5.191                                    | 5.035                                          | 5.032                                                    |
| DB15321              | 495.27                                               | 120.25                                                  | 8                                     | 4                                        | -3.699                                    | 4.113                                          | 3.364                                                    |
| DB12259              | 427.25                                               | 94.39                                                   | 7                                     | 3                                        | -3.399                                    | 3.083                                          | 2.583                                                    |
| DB16315              | 450.21                                               | 93.06                                                   | 6                                     | 2                                        | -4.121                                    | 1.909                                          | 2.296                                                    |
| DB12708              | 465.18                                               | 130                                                     | 8                                     | 3                                        | -3.377                                    | 0.366                                          | -0.647                                                   |
| DB12013              | 457.29                                               | 107.1                                                   | 7                                     | 4                                        | -2.906                                    | 2.648                                          | 1.858                                                    |
| DB12022              | 468.17                                               | 96.8                                                    | 7                                     | 1                                        | -4.282                                    | 4.022                                          | 2.957                                                    |
| DB11818              | 494.25                                               | 104.98                                                  | 9                                     | 1                                        | -3.665                                    | 2.704                                          | 2.618                                                    |
| DB15410              | 341.2                                                | 58.56                                                   | 4                                     | 2                                        | -4.032                                    | 3.433                                          | 3.472                                                    |
| DB11781              | 406.21                                               | 128.45                                                  | 8                                     | 4                                        | -3.209                                    | 2.767                                          | 2.060                                                    |
| DB05104              | 414.23                                               | 43.78                                                   | 4                                     | 1                                        | -3.628                                    | 3.849                                          | 3.472                                                    |
| DB05562              | 450.27                                               | 81.75                                                   | 7                                     | 2                                        | -3.389                                    | 3.349                                          | 3.210                                                    |
| DB12961              | 336.23                                               | 77.76                                                   | 4                                     | 3                                        | -3.537                                    | 2.254                                          | 0.805                                                    |
| DB12109              | 388.15                                               | 37.3                                                    | 2                                     | 1                                        | -5.073                                    | 4.813                                          | 4.646                                                    |
| DB15048              | 416.18                                               | 108.61                                                  | 7                                     | 4                                        | -4.358                                    | 2.311                                          | 2.169                                                    |
| DB12408              | 444.24                                               | 75.79                                                   | 5                                     | 3                                        | -3.571                                    | 3.621                                          | 3.132                                                    |
| DB12985              | 394.21                                               | 98.8                                                    | 8                                     | 3                                        | -2.741                                    | 2.076                                          | 1.842                                                    |
| DB13312              | 452.23                                               | 95.94                                                   | 7                                     | 2                                        | -3.163                                    | 3.093                                          | 2.756                                                    |
| DB02056              | 352.22                                               | 94.83                                                   | 5                                     | 3                                        | -3.281                                    | 2.213                                          | 1.132                                                    |
| DB12043              | 482.25                                               | 85.22                                                   | 6                                     | 2                                        | -5.075                                    | 4.211                                          | 4.144                                                    |
| DB12848              | 372.14                                               | 107.43                                                  | 9                                     | 1                                        | -2.192                                    | 1.541                                          | 1.754                                                    |
| DB05713              | 459.26                                               | 71.68                                                   | 7                                     | 2                                        | -2.440                                    | 2.573                                          | 2.483                                                    |
| DB09211              | 380.26                                               | 94.83                                                   | 5                                     | 3                                        | -4.011                                    | 3.558                                          | 2.412                                                    |
| DB15419              | 394.16                                               | 106.76                                                  | 8                                     | 3                                        | -3.808                                    | 1.239                                          | 1.559                                                    |
| DB05590              | 428.23                                               | 102.26                                                  | 7                                     | 4                                        | -2.800                                    | 0.363                                          | 1.238                                                    |
| DB15212              | 490.21                                               | 94.26                                                   | 8                                     | 1                                        | -5.188                                    | 5.188                                          | 3.730                                                    |
| DrugBank Database ID | Absorption                                           |                                                         |                                       | Distribution                             |                                           | Excretion                                      |                                                          |
|                      | LogP <sub>app</sub><br>(Caco-2<br>Permeabil-<br>ity) | LogP <sub>app</sub><br>(MDCK<br>Permeabil-<br>ity)      | Plasma Pro-<br>tein Binding<br>(%)    | Volume Distri-<br>bution (L/kg)          | Blood-Brain<br>Barrier (Proba-<br>bility) | % Unbound in<br>Plasma                         | Clearance<br>(mL/min/kg)                                 |
| DB15106              | -6.101                                               | 3.71 × 10 <sup>-6</sup>                                 | 72.754                                | 2.918                                    | 0.535                                     | 32.044                                         | 5.312                                                    |
| DB12100              | -5.897                                               | 2.36 × 10 <sup>-5</sup>                                 | 89.836                                | 2.122                                    | 0.214                                     | 8.761                                          | 5.83                                                     |
| DB12133              | -5.157                                               | 1.05 × 10 <sup>-5</sup>                                 | 95.185                                | 0.472                                    | 0.300                                     | 1.481                                          | 3.578                                                    |
| DB11858              | -5.575                                               | 3.96 × 10 <sup>-6</sup>                                 | 85.822                                | 0.243                                    | 0.005                                     | 8.502                                          | 2.25                                                     |
| DB12511              | -4.635                                               | 1.67 × 10 <sup>-5</sup>                                 | 101.019                               | 0.384                                    | 0.026                                     | 0.897                                          | 0.473                                                    |
| DB15321              | -5.423                                               | 4.11 × 10 <sup>-5</sup>                                 | 81.392                                | 0.595                                    | 0.455                                     | 6.880                                          | 1.203                                                    |
| DB12259              | -5.090                                               | 2.53 × 10 <sup>-5</sup>                                 | 59.020                                | 2.25                                     | 0.626                                     | 34.637                                         | 6.053                                                    |
| DB16315              | -4.800                                               | 1.63 × 10 <sup>-5</sup>                                 | 67.474                                | 0.517                                    | 0.796                                     | 25.365                                         | 8.26                                                     |
| DB12708              | -5.726                                               | 8.65 × 10 <sup>-6</sup>                                 | 84.458                                | 0.286                                    | 0.005                                     | 4.689                                          | 2.058                                                    |
| DB12013              | -5.509                                               | 5.50 × 10 <sup>-5</sup>                                 | 80.282                                | 1.332                                    | 0.220                                     | 22.992                                         | 3.538                                                    |
| DB12022              | -5.851                                               | 4.20 × 10 <sup>-5</sup>                                 | 98.983                                | 0.376                                    | 0.006                                     | 1.174                                          | 6.517                                                    |
| DB11818              | -5.237                                               | 1.87 × 10 <sup>-5</sup>                                 | 87.289                                | 1.788                                    | 0.055                                     | 8.656                                          | 6.938                                                    |
| DB15410              | -4.872                                               | 2.14 × 10 <sup>-5</sup>                                 | 89.613                                | 2.091                                    | 0.289                                     | 6.625                                          | 12.451                                                   |
| DB11781              | -5.311                                               | 1.00 × 10 <sup>-4</sup>                                 | 81.712                                | 0.789                                    | 0.499                                     | 15.970                                         | 1.134                                                    |



|         |        |                       |         |       |       |        |        |
|---------|--------|-----------------------|---------|-------|-------|--------|--------|
| DB05104 | -4.962 | $2.55 \times 10^{-5}$ | 92.658  | 3.569 | 0.596 | 4.579  | 9.584  |
| DB05562 | -5.549 | $3.63 \times 10^{-5}$ | 62.777  | 1.442 | 0.968 | 43.707 | 3.715  |
| DB12961 | -5.195 | $7.57 \times 10^{-5}$ | 88.249  | 0.235 | 0.042 | 9.047  | 5.686  |
| DB12109 | -4.987 | $1.33 \times 10^{-5}$ | 99.398  | 0.606 | 0.095 | 0.407  | 7.253  |
| DB15048 | -5.148 | $5.85 \times 10^{-6}$ | 96.521  | 0.73  | 0.114 | 2.532  | 9.541  |
| DB12408 | -4.930 | $1.78 \times 10^{-5}$ | 94.108  | 2.915 | 0.905 | 4.696  | 10.171 |
| DB12985 | -5.385 | $2.25 \times 10^{-6}$ | 86.444  | 1.801 | 0.945 | 8.508  | 3.574  |
| DB13312 | -5.534 | $3.99 \times 10^{-5}$ | 94.314  | 0.139 | 0.049 | 6.154  | 1.89   |
| DB02056 | -5.315 | $2.92 \times 10^{-5}$ | 89.316  | 0.27  | 0.320 | 11.181 | 8.95   |
| DB12043 | -4.892 | $4.05 \times 10^{-5}$ | 93.940  | 0.638 | 0.039 | 2.037  | 6.077  |
| DB12848 | -4.743 | $2.58 \times 10^{-5}$ | 88.633  | 1.921 | 0.537 | 15.274 | 9.314  |
| DB05713 | -5.635 | $5.41 \times 10^{-6}$ | 75.983  | 2.17  | 0.968 | 43.943 | 4.047  |
| DB09211 | -5.055 | $2.69 \times 10^{-5}$ | 93.461  | 0.389 | 0.137 | 2.817  | 7.267  |
| DB15419 | -4.996 | $1.26 \times 10^{-5}$ | 89.928  | 1.742 | 0.616 | 5.768  | 1.133  |
| DB05590 | -5.714 | $4.56 \times 10^{-6}$ | 45.643  | 1.91  | 0.799 | 55.357 | 11.93  |
| DB15212 | -4.927 | $1.85 \times 10^{-5}$ | 102.226 | 0.412 | 0.040 | 1.053  | 4.445  |

| DrugBank Database ID | Metabolism               |                          | Toxicity                   |                                    |                                 |
|----------------------|--------------------------|--------------------------|----------------------------|------------------------------------|---------------------------------|
|                      | Cytochrome 450 Inhibitor | Cytochrome 450 Substrate | hERG Blocker (Probability) | Human Hepatotoxicity (Probability) | Ames Mutagenicity (Probability) |
| DB15106              | CYP3A4                   | CYP1A2, CYP3A4           | 0.883                      | 0.988                              | 0.142                           |
| DB12100              | CYP2D6, CYP3A4           |                          | 0.786                      | 0.835                              | 0.672                           |
| DB12133              |                          | CYP2C9, CYP2D6           | 0.070                      | 0.859                              | 0.009                           |
| DB11858              |                          | CYP2C9                   | 0.143                      | 0.372                              | 0.034                           |
| DB12511              | CYP2C19, CYP2C9          | CYP2C9                   | 0.267                      | 0.858                              | 0.096                           |
| DB15321              | CYP2C9, CYP3A4           | CYP2C9                   | 0.126                      | 0.993                              | 0.134                           |
| DB12259              |                          | CYP2D6                   | 0.296                      | 0.987                              | 0.983                           |
| DB16315              |                          | CYP2C19, CYP3A4          | 0.087                      | 0.421                              | 0.016                           |
| DB12708              |                          | CYP2C19, CYP2C9, CYP3A4  | 0.074                      | 0.354                              | 0.010                           |
| DB12013              | CYP2D6                   |                          | 0.636                      | 0.989                              | 0.004                           |
| DB12022              | CYP2C19, CYP2C9, CYP3A4  | CYP2C9, CYP3A4           | 0.206                      | 0.371                              | 0.004                           |
| DB11818              | CYP3A4                   | CYP3A4                   | 0.028                      | 0.784                              | 0.008                           |
| DB15410              | CYP1A2, CYP2D6, CYP3A4   | CYP2D6                   | 0.925                      | 0.471                              | 0.085                           |
| DB11781              |                          | CYP2C9                   | 0.025                      | 0.985                              | 0.025                           |
| DB05104              | CYP2D6                   | CYP2C19, CYP3A4          | 0.382                      | 0.658                              | 0.020                           |
| DB05562              | CYP3A4                   | CYP2C19, CYP2D6, CYP3A4  | 0.830                      | 0.775                              | 0.025                           |
| DB12961              |                          | CYP2C9, CYP2D6           | 0.065                      | 0.861                              | 0.033                           |
| DB12109              |                          |                          | 0.042                      | 0.073                              | 0.005                           |
| DB15048              |                          | CYP2D6                   | 0.301                      | 0.248                              | 0.242                           |
| DB12408              | CYP2D6                   | CYP2C19, CYP3A4          | 0.779                      | 0.232                              | 0.258                           |
| DB12985              |                          |                          | 0.685                      | 0.996                              | 0.875                           |
| DB13312              | CYP2C19                  |                          | 0.444                      | 0.969                              | 0.003                           |
| DB02056              |                          | CYP2C9                   | 0.019                      | 0.224                              | 0.009                           |
| DB12043              | CYP2C9                   | CYP2C9                   | 0.432                      | 0.505                              | 0.030                           |
| DB12848              | CYP1A2                   |                          | 0.072                      | 0.924                              | 0.332                           |
| DB05713              |                          | CYP2C19, CYP2D6          | 0.615                      | 0.450                              | 0.015                           |
| DB09211              |                          | CYP2C9                   | 0.019                      | 0.212                              | 0.009                           |
| DB15419              |                          |                          | 0.840                      | 0.997                              | 0.513                           |
| DB05590              |                          | CYP2D6                   | 0.250                      | 0.821                              | 0.163                           |
| DB15212              | CYP2C19, CYP2C9, CYP2D6  | CYP1A2, CYP2C9, CYP2D6   | 0.702                      | 0.925                              | 0.008                           |
| Toxicity             |                          |                          | Drug-likeness              |                                    |                                 |

| DrugBank Database ID | Carcino-genicity (Probability) | Respiratory Toxicity (Probability) | Drug-likeness Score | Synthetic Accessi-bility Score | MCE-18 Score | Natural Product-likeness Score |
|----------------------|--------------------------------|------------------------------------|---------------------|--------------------------------|--------------|--------------------------------|
| DB15106              | 0.116                          | 0.958                              | 0.34                | 3.191                          | 24.000       | -1.57                          |
| DB12100              | 0.066                          | 0.948                              | 0.287               | 3.152                          | 38.000       | -0.091                         |
| DB12133              | 0.058                          | 0.326                              | 0.394               | 3.632                          | 18.000       | 1.42                           |
| DB11858              | 0.326                          | 0.629                              | 0.098               | 4.169                          | 6.000        | 1.484                          |
| DB12511              | 0.538                          | 0.038                              | 0.213               | 2.415                          | 21.000       | -0.925                         |
| DB15321              | 0.205                          | 0.556                              | 0.067               | 3.029                          | 55.146       | -0.604                         |
| DB12259              | 0.706                          | 0.869                              | 0.112               | 2.793                          | 13.000       | -0.297                         |
| DB16315              | 0.069                          | 0.046                              | 0.271               | 3.934                          | 44.947       | 0.739                          |
| DB12708              | 0.023                          | 0.014                              | 0.317               | 3.938                          | 51.765       | 0.797                          |
| DB12013              | 0.037                          | 0.874                              | 0.527               | 4.538                          | 82.591       | -0.435                         |
| DB12022              | 0.128                          | 0.014                              | 0.505               | 2.286                          | 22.000       | -1.579                         |
| DB11818              | 0.504                          | 0.041                              | 0.659               | 4.208                          | 99.429       | -0.107                         |
| DB15410              | 0.080                          | 0.363                              | 0.487               | 2.389                          | 22.000       | -0.363                         |
| DB11781              | 0.059                          | 0.849                              | 0.117               | 3.914                          | 49.545       | 0.166                          |
| DB05104              | 0.076                          | 0.927                              | 0.633               | 2.953                          | 67.800       | -0.537                         |
| DB05562              | 0.081                          | 0.925                              | 0.536               | 2.336                          | 45.231       | -1.615                         |
| DB12961              | 0.527                          | 0.884                              | 0.253               | 3.709                          | 3.000        | 1.888                          |
| DB12109              | 0.502                          | 0.015                              | 0.411               | 2.694                          | 20.000       | -0.348                         |
| DB15048              | 0.150                          | 0.007                              | 0.579               | 3.728                          | 78.471       | 1.045                          |
| DB12408              | 0.439                          | 0.938                              | 0.51                | 2.672                          | 54.054       | -0.047                         |
| DB12985              | 0.908                          | 0.892                              | 0.257               | 2.782                          | 49.241       | -1.122                         |
| DB13312              | 0.023                          | 0.041                              | 0.509               | 3.194                          | 60.081       | -0.265                         |
| DB02056              | 0.188                          | 0.225                              | 0.37                | 3.966                          | 20.118       | 1.924                          |
| DB12043              | 0.039                          | 0.828                              | 0.385               | 4.282                          | 68.372       | 0.363                          |
| DB12848              | 0.951                          | 0.649                              | 0.5                 | 2.697                          | 24.000       | -2.003                         |
| DB05713              | 0.035                          | 0.985                              | 0.616               | 2.906                          | 90.316       | -1.115                         |
| DB09211              | 0.668                          | 0.522                              | 0.333               | 4.247                          | 22.105       | 2.049                          |
| DB15419              | 0.856                          | 0.627                              | 0.263               | 3.91                           | 88.000       | -1.127                         |
| DB05590              | 0.152                          | 0.163                              | 0.484               | 3.318                          | 61.343       | -0.237                         |
| DB15212              | 0.365                          | 0.152                              | 0.244               | 2.917                          | 44.000       | -0.853                         |

**Table S5.** Comparative performance of top-performing experimental drugs as potential inhibitors of the RBD of SARS-CoV-2 variants.

| DrugBank Database ID | Docking Score (%) |         |         |       |       |           |
|----------------------|-------------------|---------|---------|-------|-------|-----------|
|                      | Wild              | B.1.1.7 | B.1.351 | P.1   | Mean  | Std. Dev. |
| DB03438              | 92.27             | 92.70   | 92.44   | 92.14 | 92.39 | 0.24      |
| DB01871              | 92.03             | 92.35   | 93.13   | 92.01 | 92.38 | 0.52      |
| DB14067              | 92.71             | 92.44   | 92.44   | 91.55 | 92.29 | 0.51      |
| DB06835              | 91.22             | 92.71   | 92.75   | 91.70 | 92.10 | 0.76      |
| DB07136              | 91.98             | 91.97   | 92.53   | 91.59 | 92.02 | 0.39      |
| DB08420              | 92.41             | 92.19   | 91.34   | 92.00 | 91.99 | 0.46      |
| DB04136              | 90.97             | 92.48   | 92.17   | 92.24 | 91.97 | 0.68      |
| DB07521              | 91.58             | 92.06   | 92.02   | 92.05 | 91.93 | 0.23      |
| DB03949              | 91.16             | 92.00   | 92.42   | 92.11 | 91.92 | 0.54      |
| DB08180              | 92.03             | 91.82   | 91.45   | 92.36 | 91.92 | 0.38      |
| DB07349              | 92.11             | 91.55   | 92.61   | 91.36 | 91.91 | 0.57      |
| DB07589              | 91.53             | 92.20   | 91.48   | 92.34 | 91.89 | 0.45      |
| DB07219              | 91.20             | 92.07   | 91.81   | 92.45 | 91.88 | 0.53      |
| DB03565              | 91.09             | 92.36   | 92.03   | 91.84 | 91.83 | 0.54      |
| DB01834              | 91.19             | 91.55   | 91.80   | 92.70 | 91.81 | 0.64      |
| DB03866              | 91.19             | 92.15   | 91.60   | 92.05 | 91.75 | 0.44      |
| DB04244              | 91.11             | 92.31   | 92.12   | 91.36 | 91.73 | 0.58      |
| DB07157              | 91.28             | 92.04   | 92.34   | 91.22 | 91.72 | 0.56      |
| DB02307              | 91.01             | 92.21   | 92.06   | 91.48 | 91.69 | 0.55      |
| DB07269              | 90.49             | 92.10   | 92.14   | 92.02 | 91.69 | 0.80      |
| DB08732              | 92.25             | 91.52   | 90.86   | 91.95 | 91.65 | 0.60      |
| DB13203              | 90.59             | 92.08   | 91.84   | 92.07 | 91.65 | 0.71      |
| DB08585              | 91.05             | 91.88   | 91.54   | 92.09 | 91.64 | 0.45      |
| DB02112              | 91.41             | 91.70   | 91.64   | 91.80 | 91.64 | 0.17      |
| DB04732              | 90.95             | 91.89   | 91.77   | 91.80 | 91.60 | 0.44      |
| DB07841              | 90.96             | 92.18   | 91.48   | 91.79 | 91.60 | 0.52      |
| DB02128              | 91.03             | 91.68   | 91.79   | 91.77 | 91.57 | 0.36      |
| DB04118              | 91.17             | 90.98   | 92.04   | 92.01 | 91.55 | 0.55      |
| DB06886              | 91.32             | 91.44   | 91.81   | 91.61 | 91.55 | 0.21      |
| DB11425              | 91.99             | 91.74   | 91.15   | 91.30 | 91.55 | 0.39      |
| DB07400              | 90.81             | 91.52   | 92.06   | 91.79 | 91.55 | 0.54      |

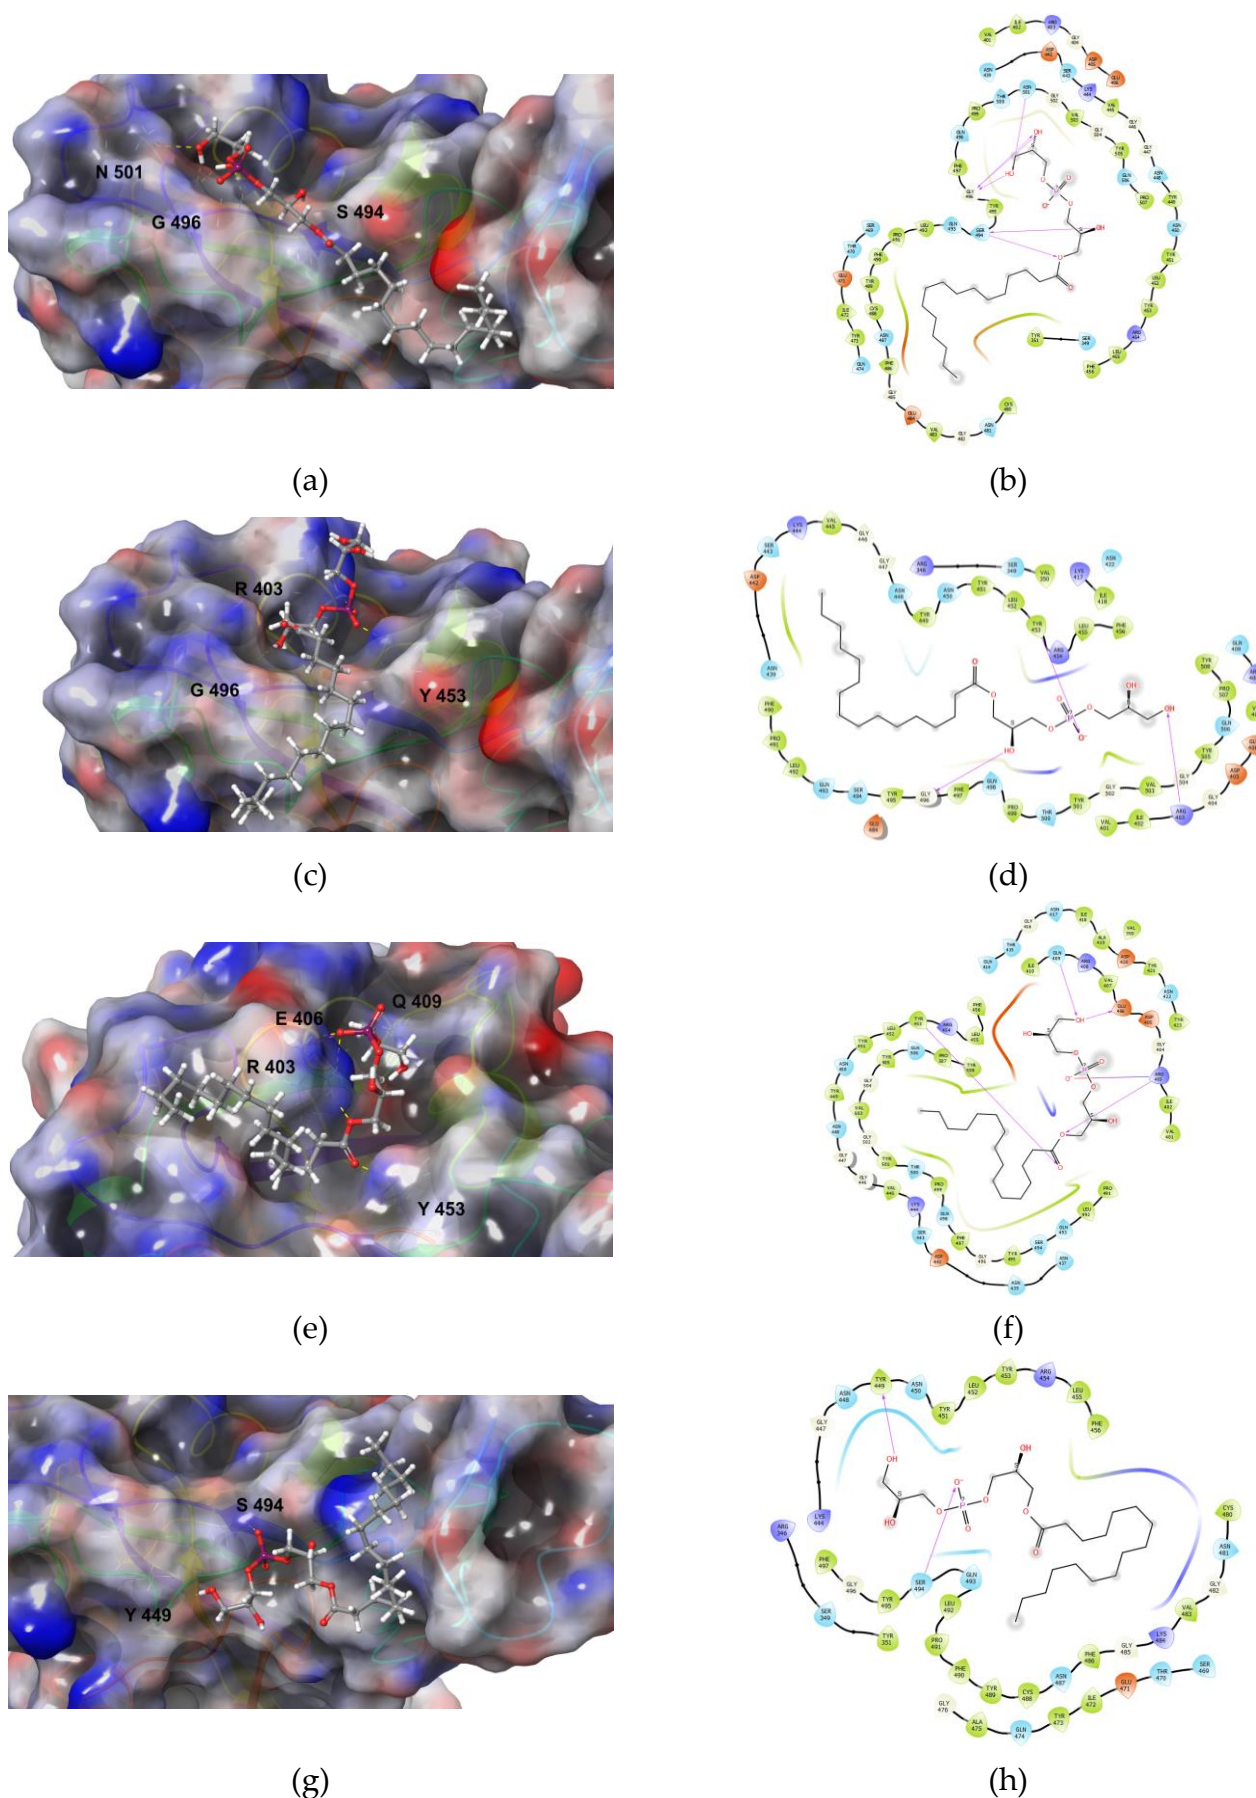

**Figure S3.** Structures of Lysophosphatidylglycerol, the top-performing experimental drug, docked in the RBD of SARS-CoV-2 and their corresponding ligand interaction diagrams: (a-b) Wild type; (c-d) B.1.1.7 variant; (e-f) B.1.351 variant; and (g-h) P.1 variant.

**Table S6.** ADMET properties of top-performing experimental drugs as potential inhibitors of the RBD of SARS-CoV-2 variants (Green: excellent; Yellow: medium; Red: poor).

| DrugBank Database ID | Physicochemical Properties                |                                                  |                             |                                |                                   |                                        |                                                       |
|----------------------|-------------------------------------------|--------------------------------------------------|-----------------------------|--------------------------------|-----------------------------------|----------------------------------------|-------------------------------------------------------|
|                      | Molar Mass (g mol <sup>-1</sup> )         | Topological-Polar Surface Area (Å <sup>2</sup> ) | No. of Hydrogen Bond Donors | No. of Hydrogen Bond Acceptors | LogS (Solubility, mol/L)          | LogP (Distribution Coefficient, mol/L) | LogD <sub>7.4</sub> (Distribution Coefficient, mol/L) |
| DB03438              | 484.28                                    | 139.59                                           | 9                           | 3                              | -3.456                            | 3.700                                  | 2.105                                                 |
| DB01871              | 460.2                                     | 104.73                                           | 7                           | 3                              | -4.187                            | 3.230                                  | 3.132                                                 |
| DB14067              | 481.24                                    | 65.9                                             | 6                           | 1                              | -4.134                            | 3.965                                  | 3.690                                                 |
| DB06835              | 482.16                                    | 143.63                                           | 8                           | 4                              | -1.126                            | -0.138                                 | 0.224                                                 |
| DB07136              | 496.18                                    | 143.63                                           | 8                           | 4                              | -1.287                            | 0.087                                  | 0.585                                                 |
| DB08420              | 434.21                                    | 139.68                                           | 8                           | 5                              | -1.630                            | 0.314                                  | 1.258                                                 |
| DB04136              | 485.28                                    | 165.61                                           | 10                          | 5                              | -2.636                            | 1.211                                  | 1.011                                                 |
| DB07521              | 483.16                                    | 68.43                                            | 6                           | 4                              | -1.598                            | 3.128                                  | 2.883                                                 |
| DB03949              | 492.17                                    | 115.73                                           | 7                           | 4                              | -3.658                            | 3.082                                  | 2.954                                                 |
| DB08180              | 453.2                                     | 110.21                                           | 8                           | 1                              | -2.907                            | 0.781                                  | 0.629                                                 |
| DB07349              | 456.21                                    | 145.66                                           | 10                          | 2                              | -2.704                            | 2.453                                  | 0.815                                                 |
| DB07589              | 485.16                                    | 121.52                                           | 7                           | 5                              | -2.582                            | 0.530                                  | 1.657                                                 |
| DB07219              | 473.25                                    | 117.34                                           | 9                           | 2                              | -3.636                            | 2.675                                  | 2.405                                                 |
| DB03565              | 489.26                                    | 131.22                                           | 9                           | 2                              | -2.325                            | 2.356                                  | 1.328                                                 |
| DB01834              | 501.16                                    | 179.05                                           | 10                          | 7                              | -3.531                            | -2.040                                 | -0.311                                                |
| DB03866              | 368.22                                    | 85.22                                            | 6                           | 2                              | -3.570                            | 3.405                                  | 3.011                                                 |
| DB04244              | 481.2                                     | 108.39                                           | 7                           | 3                              | -4.886                            | 3.873                                  | 3.415                                                 |
| DB07157              | 450.16                                    | 145.02                                           | 9                           | 4                              | -2.174                            | 0.516                                  | 0.798                                                 |
| DB02307              | 441.19                                    | 158.82                                           | 9                           | 6                              | -2.137                            | -0.348                                 | 0.258                                                 |
| DB07269              | 448.18                                    | 135.79                                           | 8                           | 4                              | -1.666                            | 1.055                                  | 1.017                                                 |
| DB08732              | 398.18                                    | 104.73                                           | 7                           | 3                              | -2.944                            | 2.054                                  | 2.075                                                 |
| DB13203              | 385.21                                    | 85.29                                            | 8                           | 1                              | -1.213                            | 1.154                                  | 1.181                                                 |
| DB08585              | 456.17                                    | 159.1                                            | 10                          | 4                              | -1.892                            | -0.141                                 | -0.128                                                |
| DB02112              | 489.25                                    | 91.12                                            | 6                           | 4                              | -4.212                            | 4.127                                  | 2.814                                                 |
| DB04732              | 441.24                                    | 111.13                                           | 8                           | 4                              | -3.171                            | 1.823                                  | 3.329                                                 |
| DB07841              | 450.19                                    | 106.97                                           | 7                           | 1                              | -2.593                            | 4.273                                  | 1.271                                                 |
| DB02128              | 475.21                                    | 117.62                                           | 8                           | 3                              | -3.345                            | 2.532                                  | 2.486                                                 |
| DB04118              | 491.18                                    | 94.72                                            | 7                           | 2                              | -4.608                            | 4.170                                  | 3.855                                                 |
| DB06886              | 467.24                                    | 107.97                                           | 8                           | 3                              | -3.543                            | 2.850                                  | 2.834                                                 |
| DB11425              | 444.14                                    | 107.22                                           | 6                           | 4                              | -3.779                            | 2.790                                  | 2.093                                                 |
| DrugBank Database ID | Absorption                                |                                                  |                             | Distribution                   |                                   | Excretion                              |                                                       |
|                      | LogP <sub>app</sub> (Caco-2 Permeability) | LogP <sub>app</sub> (MDCK Permeability)          | Plasma Protein Binding (%)  | Volume Distribution (L/kg)     | Blood-Brain Barrier (Probability) | % Unbound in Plasma                    | Clearance (mL/min/kg)                                 |
| DB03438              | -5.157                                    | 4.56E-05                                         | 95.364                      | 0.667                          | 0.106                             | 2.481                                  | 1.643                                                 |
| DB01871              | -5.101                                    | 1.80E-04                                         | 96.207                      | 0.536                          | 0.061                             | 5.004                                  | 7.029                                                 |
| DB14067              | -5.519                                    | 2.03E-05                                         | 95.842                      | 2.016                          | 0.805                             | 1.856                                  | 6.7                                                   |
| DB06835              | -6.093                                    | 9.81E-06                                         | 34.018                      | 0.429                          | 0.071                             | 59.888                                 | 0.969                                                 |
| DB07136              | -6.028                                    | 9.76E-06                                         | 35.513                      | 0.433                          | 0.068                             | 55.745                                 | 0.958                                                 |
| DB08420              | -5.808                                    | 6.98E-06                                         | 85.854                      | 0.843                          | 0.118                             | 15.493                                 | 4.925                                                 |
| DB04136              | -5.631                                    | 5.52E-05                                         | 91.717                      | 0.546                          | 0.196                             | 6.886                                  | 0.947                                                 |
| DB07521              | -5.912                                    | 5.99E-06                                         | 60.971                      | 1.028                          | 0.149                             | 58.314                                 | 4.669                                                 |
| DB03949              | -6.177                                    | 5.05E-06                                         | 98.525                      | 0.378                          | 0.009                             | 0.862                                  | 3.02                                                  |
| DB08180              | -5.502                                    | 4.84E-05                                         | 74.231                      | 0.884                          | 0.975                             | 10.472                                 | 1.757                                                 |
| DB07349              | -5.074                                    | 9.44E-05                                         | 84.358                      | 0.532                          | 0.212                             | 15.690                                 | 2.116                                                 |
| DB07589              | -5.909                                    | 1.34E-05                                         | 44.369                      | 0.709                          | 0.034                             | 37.404                                 | 3.822                                                 |
| DB07219              | -5.158                                    | 4.86E-05                                         | 86.736                      | 0.596                          | 0.192                             | 12.523                                 | 5.886                                                 |
| DB03565              | -5.517                                    | 3.95E-05                                         | 86.335                      | 0.797                          | 0.101                             | 5.811                                  | 1.175                                                 |



|         |        |          |        |       |       |        |       |
|---------|--------|----------|--------|-------|-------|--------|-------|
| DB01834 | -6.631 | 5.30E-06 | 75.609 | 0.175 | 0.107 | 36.199 | 1.624 |
| DB03866 | -5.301 | 4.17E-05 | 95.943 | 0.408 | 0.005 | 2.422  | 2.072 |
| DB04244 | -5.808 | 1.53E-05 | 95.529 | 1.004 | 0.099 | 3.197  | 1.619 |
| DB07157 | -5.840 | 3.63E-05 | 41.008 | 0.453 | 0.156 | 53.543 | 1.262 |
| DB02307 | -6.291 | 6.60E-05 | 89.443 | 0.346 | 0.056 | 19.346 | 0.978 |
| DB07269 | -5.686 | 1.70E-05 | 33.189 | 0.666 | 0.199 | 58.990 | 1.073 |
| DB08732 | -5.038 | 1.21E-04 | 87.004 | 0.381 | 0.204 | 15.615 | 6.679 |
| DB13203 | -5.005 | 1.59E-05 | 66.213 | 1.698 | 0.888 | 35.397 | 2.337 |
| DB08585 | -5.405 | 4.93E-06 | 47.271 | 0.477 | 0.475 | 64.365 | 2.002 |
| DB02112 | -5.980 | 5.81E-06 | 90.550 | 1.069 | 0.802 | 3.646  | 0.97  |
| DB04732 | -5.601 | 2.87E-05 | 94.377 | 0.511 | 0.586 | 3.169  | 4.203 |
| DB07841 | -5.120 | 1.41E-05 | 84.889 | 4.663 | 0.102 | 4.477  | 1.775 |
| DB02128 | -4.979 | 7.70E-05 | 91.243 | 0.799 | 0.121 | 9.854  | 6.23  |
| DB04118 | -4.965 | 2.27E-05 | 96.536 | 0.839 | 0.077 | 2.005  | 5.099 |
| DB06886 | -5.337 | 1.32E-04 | 92.642 | 0.627 | 0.073 | 9.046  | 5.759 |
| DB11425 | -5.626 | 4.82E-06 | 98.154 | 0.331 | 0.110 | 1.694  | 7.333 |

| DrugBank Database ID | Metabolism                      |                                 | Toxicity                   |                                    |                                 |
|----------------------|---------------------------------|---------------------------------|----------------------------|------------------------------------|---------------------------------|
|                      | Cytochrome 450 Inhibitor        | Cytochrome 450 Substrate        | hERG Blocker (Probability) | Human Hepatotoxicity (Probability) | Ames Mutagenicity (Probability) |
| DB03438              |                                 |                                 | 0.347                      | 0.029                              | 0.016                           |
| DB01871              | CYP2C19, CYP2C9, CYP2D6, CYP3A4 |                                 | 0.383                      | 0.624                              | 0.458                           |
| DB14067              | CYP2C19, CYP2D6, CYP3A4         | CYP2C19, CYP2D6, CYP3A4         | 0.986                      | 0.701                              | 0.049                           |
| DB06835              |                                 | CYP2C9                          | 0.016                      | 0.690                              | 0.007                           |
| DB07136              |                                 | CYP2C9                          | 0.020                      | 0.706                              | 0.006                           |
| DB08420              |                                 | CYP2C9                          | 0.212                      | 0.988                              | 0.044                           |
| DB04136              |                                 | CYP2C9                          | 0.183                      | 0.187                              | 0.444                           |
| DB07521              | CYP2D6                          | CYP2C19                         | 0.423                      | 0.999                              | 0.921                           |
| DB03949              | CYP2C9                          | CYP2C9                          | 0.124                      | 0.635                              | 0.037                           |
| DB08180              |                                 | CYP2C9                          | 0.020                      | 0.511                              | 0.003                           |
| DB07349              |                                 |                                 | 0.047                      | 0.091                              | 0.182                           |
| DB07589              | CYP2C9, CYP3A4                  | CYP3A4                          | 0.041                      | 0.923                              | 0.057                           |
| DB07219              |                                 |                                 | 0.020                      | 0.506                              | 0.015                           |
| DB03565              |                                 |                                 | 0.232                      | 0.126                              | 0.547                           |
| DB01834              |                                 | CYP2C9                          | 0.084                      | 0.244                              | 0.009                           |
| DB03866              |                                 | CYP1A2, CYP2C19, CYP2C9, CYP2D6 | 0.108                      | 0.326                              | 0.848                           |
| DB04244              | CYP2C19, CYP2C9, CYP3A4         |                                 | 0.444                      | 0.836                              | 0.007                           |
| DB07157              |                                 | CYP2C9                          | 0.031                      | 0.253                              | 0.009                           |
| DB02307              |                                 | CYP2C9                          | 0.031                      | 0.735                              | 0.006                           |
| DB07269              |                                 | CYP2C9                          | 0.029                      | 0.261                              | 0.012                           |
| DB08732              |                                 |                                 | 0.141                      | 0.530                              | 0.067                           |
| DB13203              |                                 | CYP2C19, CYP3A4                 | 0.186                      | 0.086                              | 0.094                           |
| DB08585              |                                 | CYP2C9                          | 0.006                      | 0.042                              | 0.037                           |
| DB02112              |                                 | CYP1A2, CYP2D6                  | 0.935                      | 0.990                              | 0.339                           |
| DB04732              |                                 | CYP2C9                          | 0.012                      | 0.984                              | 0.068                           |
| DB07841              |                                 | CYP2C9                          | 0.006                      | 0.867                              | 0.005                           |
| DB02128              | CYP2C19, CYP2C9, CYP3A4         |                                 | 0.462                      | 0.551                              | 0.120                           |
| DB04118              | CYP2C19, CYP2C9, CYP2D6, CYP3A4 | CYP2C9, CYP3A4                  | 0.640                      | 0.573                              | 0.915                           |
| DB06886              | CYP2C19, CYP2C9, CYP3A4         |                                 | 0.069                      | 0.906                              | 0.009                           |
| DB11425              |                                 | CYP2C9                          | 0.206                      | 0.461                              | 0.009                           |

| DrugBank Database ID | Toxicity                      |                                    | Drug-likeness       |                               |              |                                |
|----------------------|-------------------------------|------------------------------------|---------------------|-------------------------------|--------------|--------------------------------|
|                      | Carcinogenicity (Probability) | Respiratory Toxicity (Probability) | Drug-likeness Score | Synthetic Accessibility Score | MCE-18 Score | Natural Product-likeness Score |
| DB03438              | 0.550                         | 0.420                              | 0.111               | 3.995                         | 6.000        | 0.552                          |
| DB01871              | 0.217                         | 0.015                              | 0.408               | 2.765                         | 34.000       | 0.027                          |
| DB14067              | 0.144                         | 0.975                              | 0.413               | 2.731                         | 80.263       | -1.029                         |
| DB06835              | 0.042                         | 0.125                              | 0.395               | 3.973                         | 38.000       | -0.3                           |
| DB07136              | 0.037                         | 0.156                              | 0.361               | 3.968                         | 38.000       | -0.279                         |
| DB08420              | 0.909                         | 0.487                              | 0.437               | 3.47                          | 61.903       | -0.668                         |
| DB04136              | 0.494                         | 0.819                              | 0.096               | 4.374                         | 7.000        | 0.484                          |
| DB07521              | 0.054                         | 0.827                              | 0.25                | 4.277                         | 72.600       | -0.664                         |
| DB03949              | 0.122                         | 0.021                              | 0.264               | 3.109                         | 38.000       | 0.091                          |
| DB08180              | 0.502                         | 0.608                              | 0.263               | 4.429                         | 0.000        | 0.667                          |
| DB07349              | 0.761                         | 0.081                              | 0.169               | 4.089                         | 7.000        | 0.718                          |
| DB07589              | 0.209                         | 0.950                              | 0.409               | 3.524                         | 76.645       | -0.588                         |
| DB07219              | 0.024                         | 0.010                              | 0.372               | 3.65                          | 66.000       | -0.387                         |
| DB03565              | 0.667                         | 0.378                              | 0.149               | 4.658                         | 7.000        | 0.195                          |
| DB01834              | 0.018                         | 0.035                              | 0.262               | 3.767                         | 65.625       | 0.545                          |
| DB03866              | 0.396                         | 0.941                              | 0.215               | 5.217                         | 27.429       | 2.296                          |
| DB04244              | 0.213                         | 0.418                              | 0.389               | 3.221                         | 40.000       | -0.731                         |
| DB07157              | 0.011                         | 0.037                              | 0.466               | 3.873                         | 34.000       | -0.098                         |
| DB02307              | 0.070                         | 0.033                              | 0.306               | 3.067                         | 30.000       | 0.175                          |
| DB07269              | 0.017                         | 0.102                              | 0.472               | 3.85                          | 34.000       | -0.045                         |
| DB08732              | 0.044                         | 0.013                              | 0.568               | 2.801                         | 26.000       | -0.014                         |
| DB13203              | 0.074                         | 0.424                              | 0.604               | 2.46                          | 19.000       | -1.471                         |
| DB08585              | 0.007                         | 0.091                              | 0.209               | 3.94                          | 10.000       | -0.255                         |
| DB02112              | 0.685                         | 0.674                              | 0.205               | 2.678                         | 72.421       | -0.319                         |
| DB04732              | 0.933                         | 0.036                              | 0.462               | 3.257                         | 61.471       | -0.792                         |
| DB07841              | 0.919                         | 0.760                              | 0.232               | 4.428                         | 0.000        | 1.002                          |
| DB02128              | 0.048                         | 0.020                              | 0.371               | 2.968                         | 34.000       | -0.097                         |
| DB04118              | 0.868                         | 0.706                              | 0.304               | 3.876                         | 101.486      | 0.243                          |
| DB06886              | 0.023                         | 0.012                              | 0.525               | 3.296                         | 61.108       | -0.39                          |
| DB11425              | 0.264                         | 0.691                              | 0.290               | 4.037                         | 46.242       | 0.429                          |

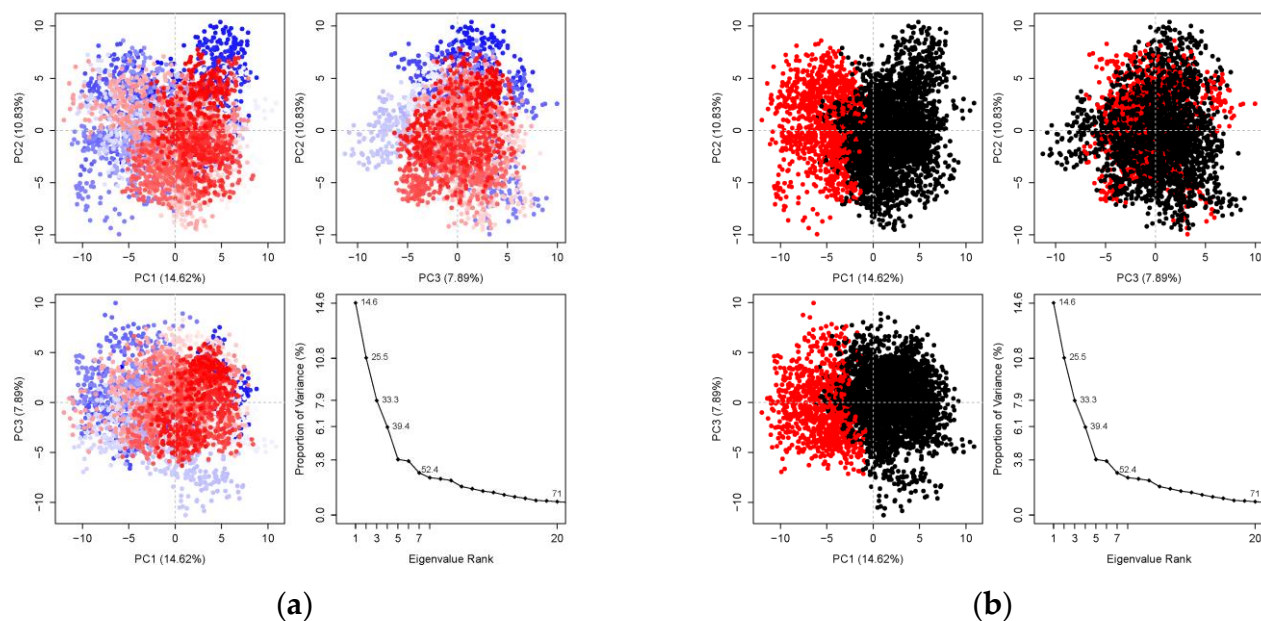

**Figure S4.** (a) Principal Component Analysis (PCA) for the MD trajectory of Salmeterol binding into Wild-type RBD. The trajectory frames are colored from blue to white to red in time order. (b) Simple clustering in PC subspace. The conformations were divided into two clusters (black and red) according to the top 3 PC-spaces shown in the PC subspace.

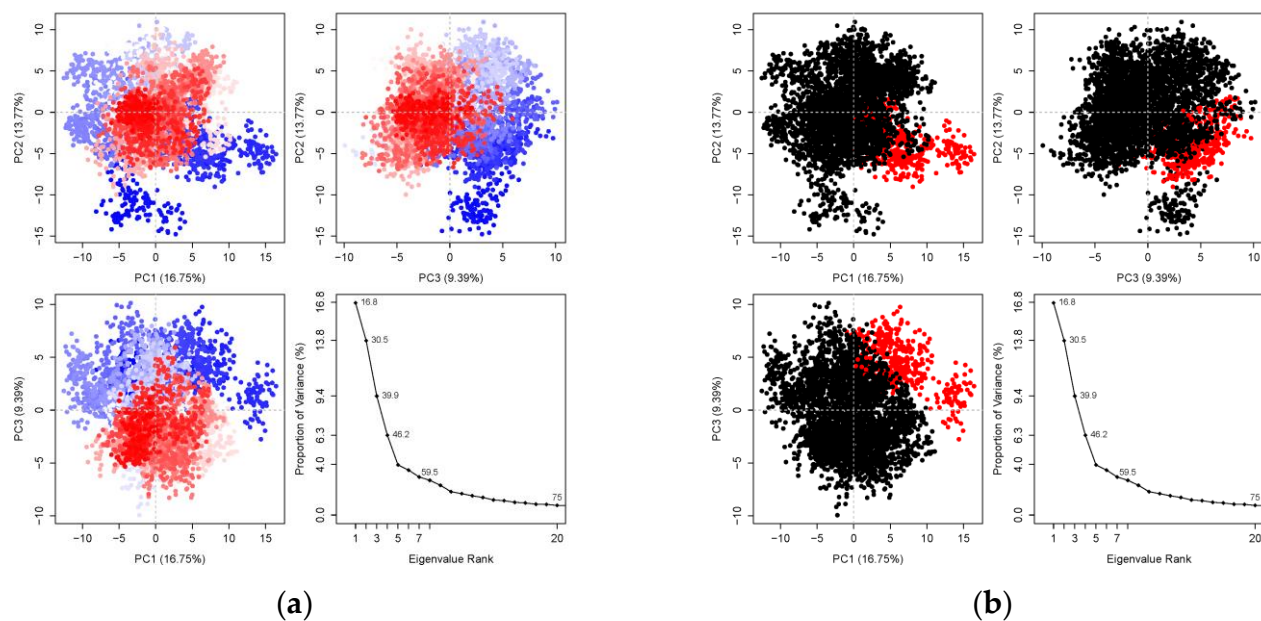

**Figure S5.** (a) Principal Component Analysis (PCA) for the MD trajectory of the unbinding process between Salmeterol and Wild-type RBD. The trajectory frames are colored from blue to white to red in time order. (b) Simple clustering in PC subspace. The conformations were divided into two clusters (black and red) according to the top 3 PC-spaces shown in the PC subspace.

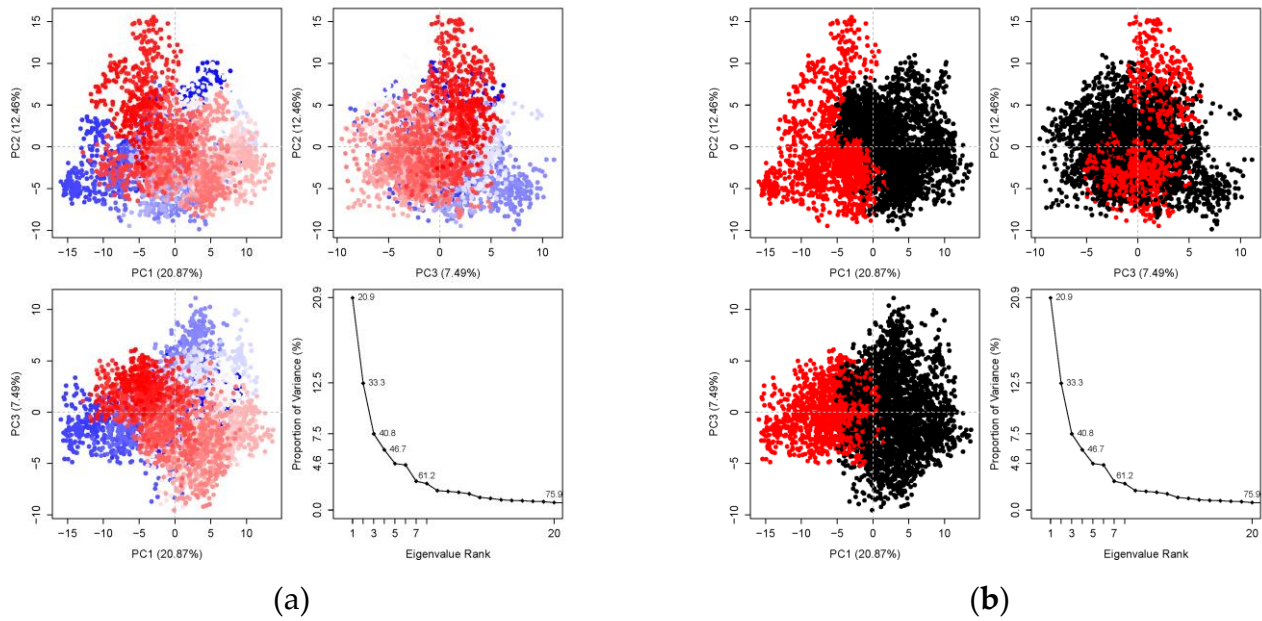

**Figure S6.** (a) Principal Component Analysis (PCA) for the MD trajectory of Salmeterol binding into SARS-CoV-2 B.1.1.7 Variant RBD. The trajectory frames are colored from blue to white to red in time order. (b) Simple clustering in PC subspace. The conformations were divided into two clusters (black and red) according to the top 3 PC-spaces shown in the PC subspace.

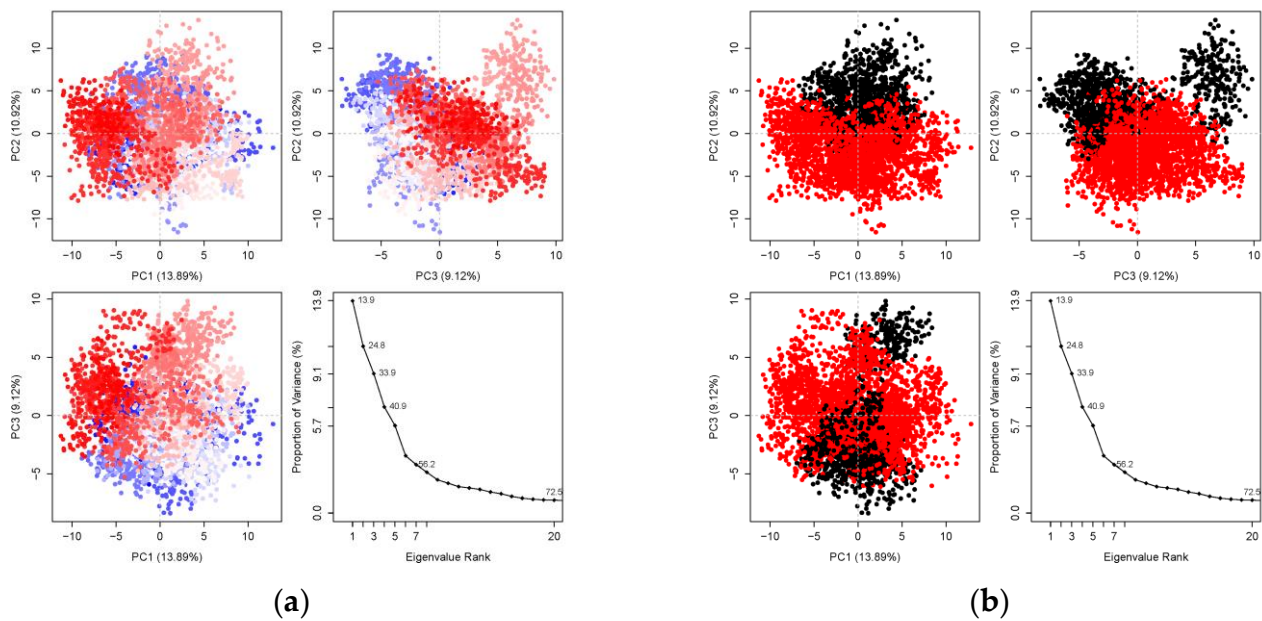

**Figure S7.** (a) Principal Component Analysis (PCA) for the MD trajectory of the unbinding process between Salmeterol and SARS-CoV-2 B.1.1.7 RBD. The trajectory frames are colored from blue to white to red in time order. (b) Simple clustering in PC subspace. The conformations were divided into two clusters (black and red) according to the top 3 PC-spaces shown in the PC subspace.



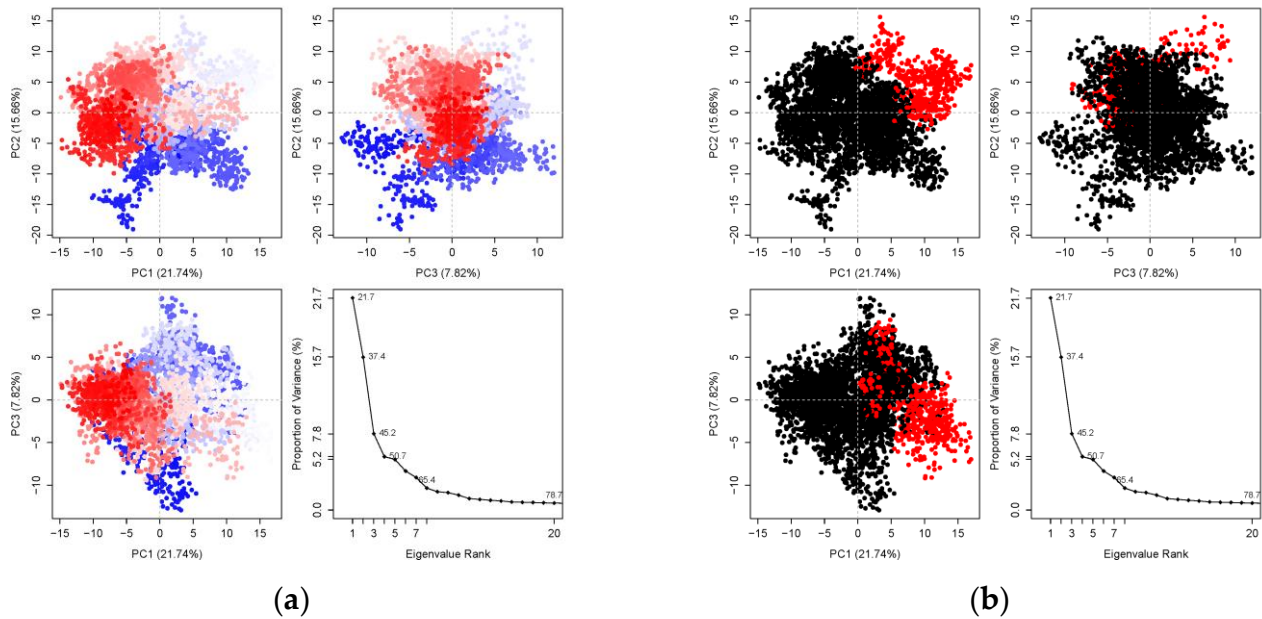

**Figure S8.** (a) Principal Component Analysis (PCA) for the MD trajectory of Salmeterol binding into SARS-CoV-2 B.1.351 Variant RBD. The trajectory frames are colored from blue to white to red in time order. (b) Simple clustering in PC subspace. The conformations were divided into two clusters (black and red) according to the top 3 PC-spaces shown in the PC subspace.

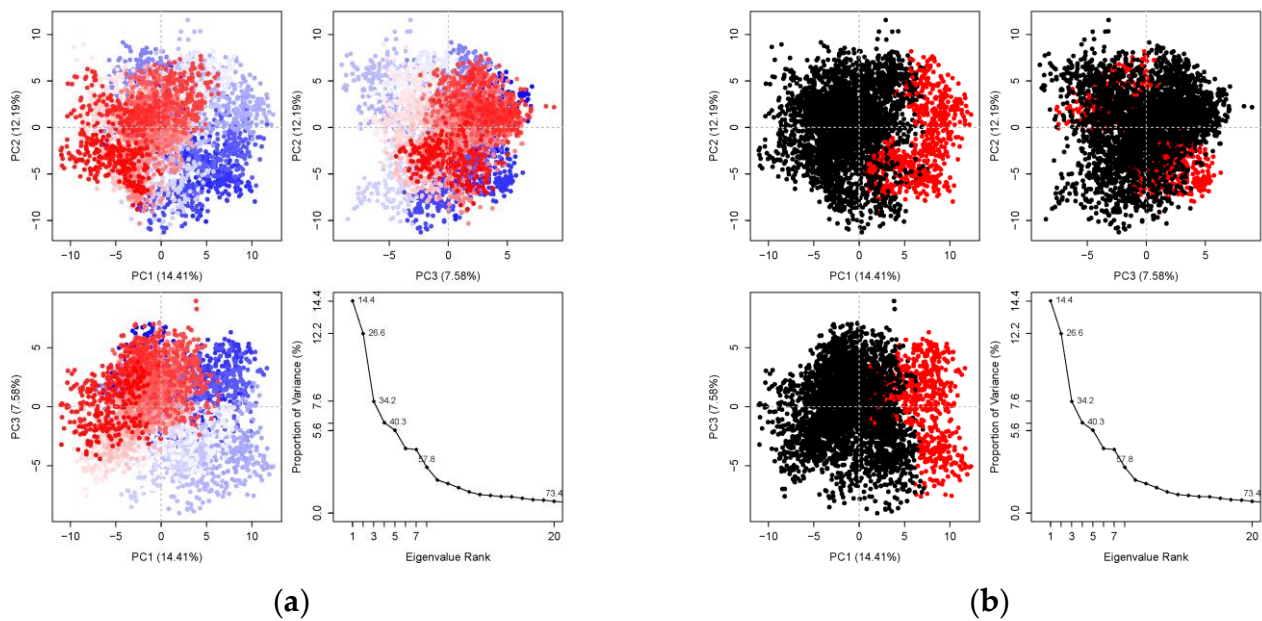

**Figure S9.** (a) Principal Component Analysis (PCA) for the MD trajectory of the unbinding process between Salmeterol and SARS-CoV-2 B.1.351 RBD. The trajectory frames are colored from blue to white to red in time order. (b) Simple clustering in PC subspace. The conformations were divided into two clusters (black and red) according to the top 3 PC-spaces shown in the PC subspace.



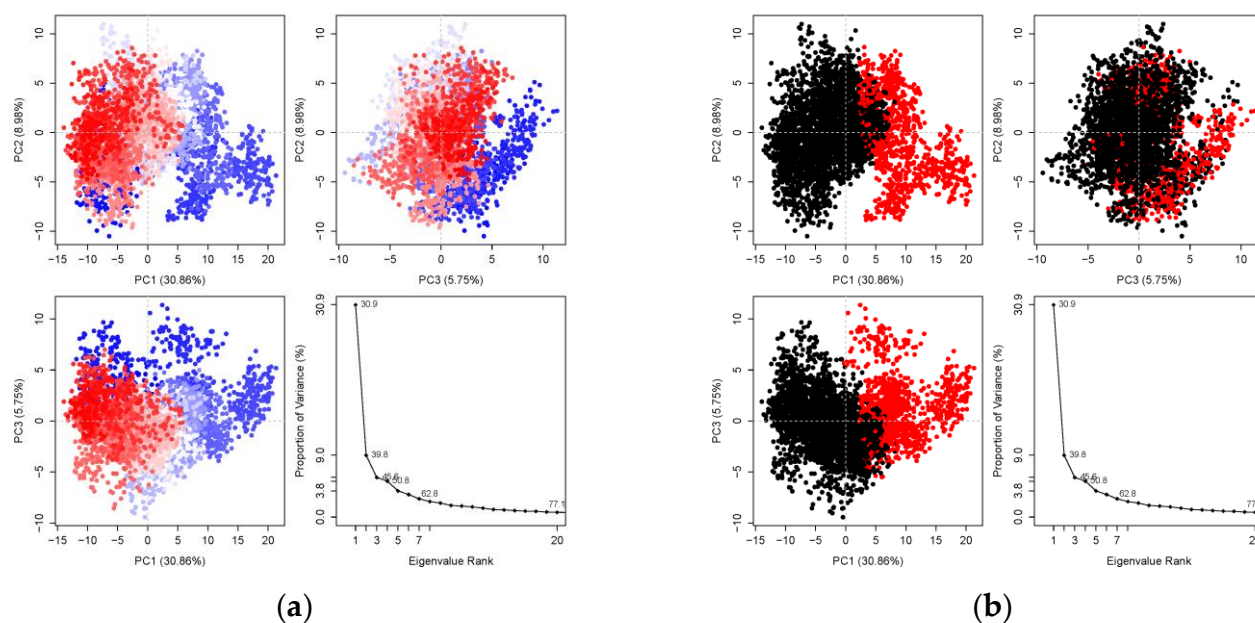

**Figure S10.** (a) Principal Component Analysis (PCA) for the MD trajectory of Salmeterol binding into SARS-CoV-2 P.1 Variant RBD. The trajectory frames are colored from blue to white to red in time order. (b) Simple clustering in PC subspace. The conformations were divided into two clusters (black and red) according to the top 3 PC-spaces shown in the PC subspace.

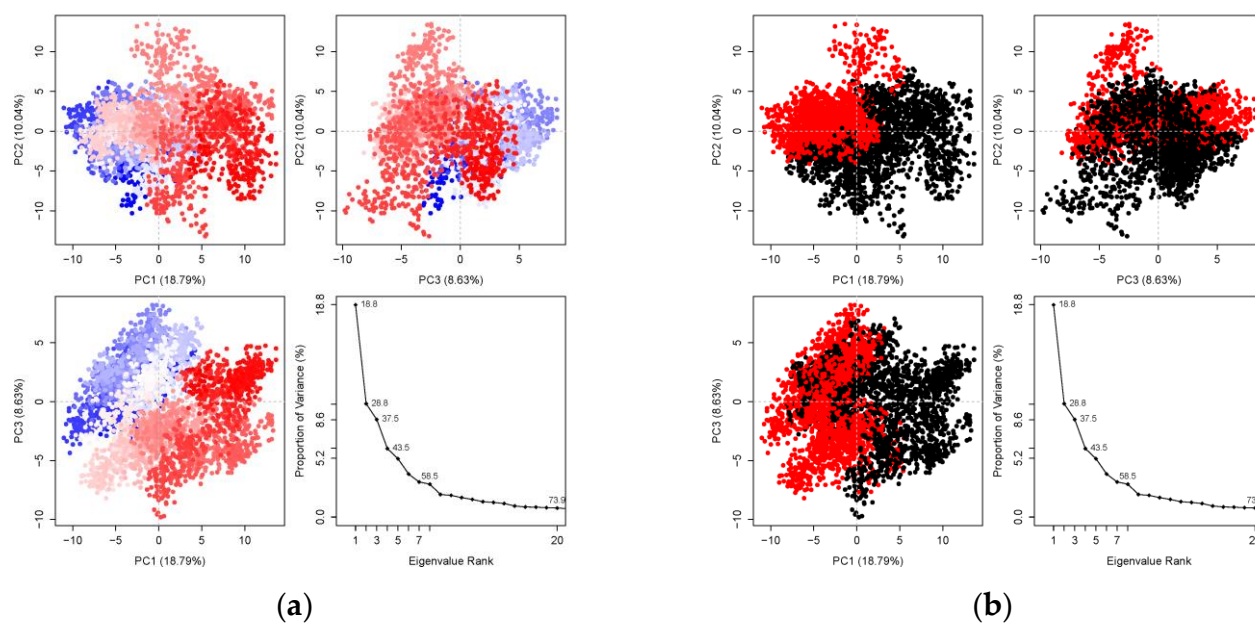

**Figure S11.** (a) Principal Component Analysis (PCA) for the MD trajectory of the unbinding process between Salmeterol and SARS-CoV-2 P.1 RBD. The trajectory frames are colored from blue to white to red in time order. (b) Simple clustering in PC subspace. The conformations were divided into two clusters (black and red) according to the top 3 PC-spaces shown in the PC subspace.

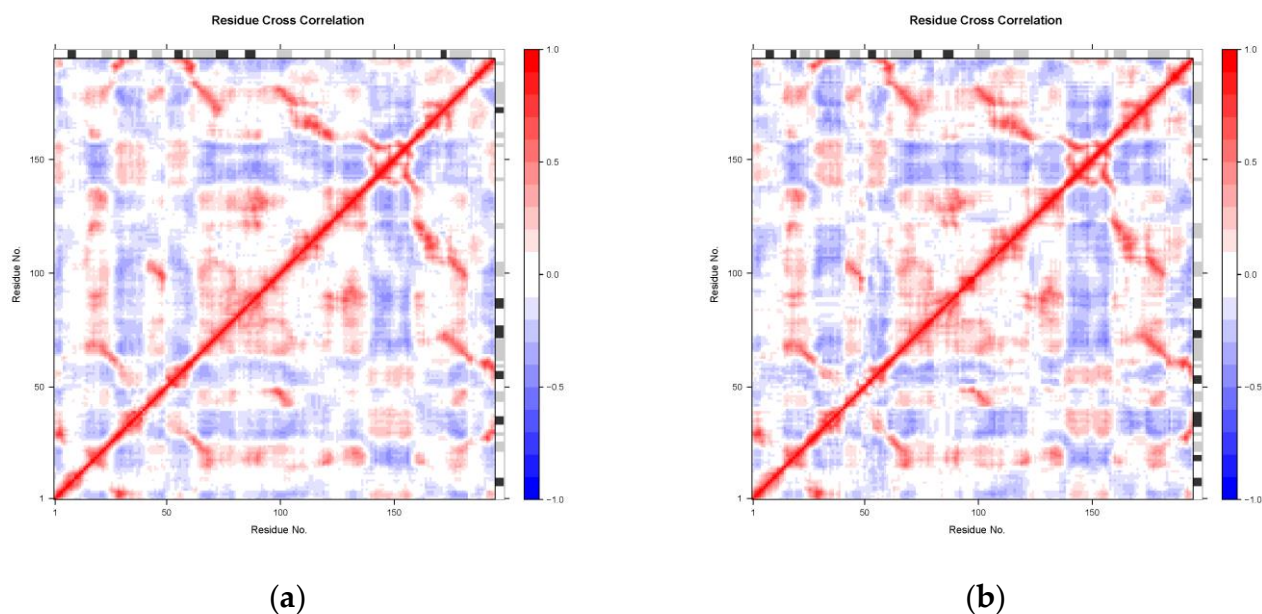

**Figure S12.** Dynamical residue cross-correlation map for the MD trajectory of the (a) binding process and (b) unbinding process of the receptor-ligand complex involving Salmeterol docked in Wild-type RBD. PCA results for a trajectory with trajectory frames colored from blue to white to red in time order.

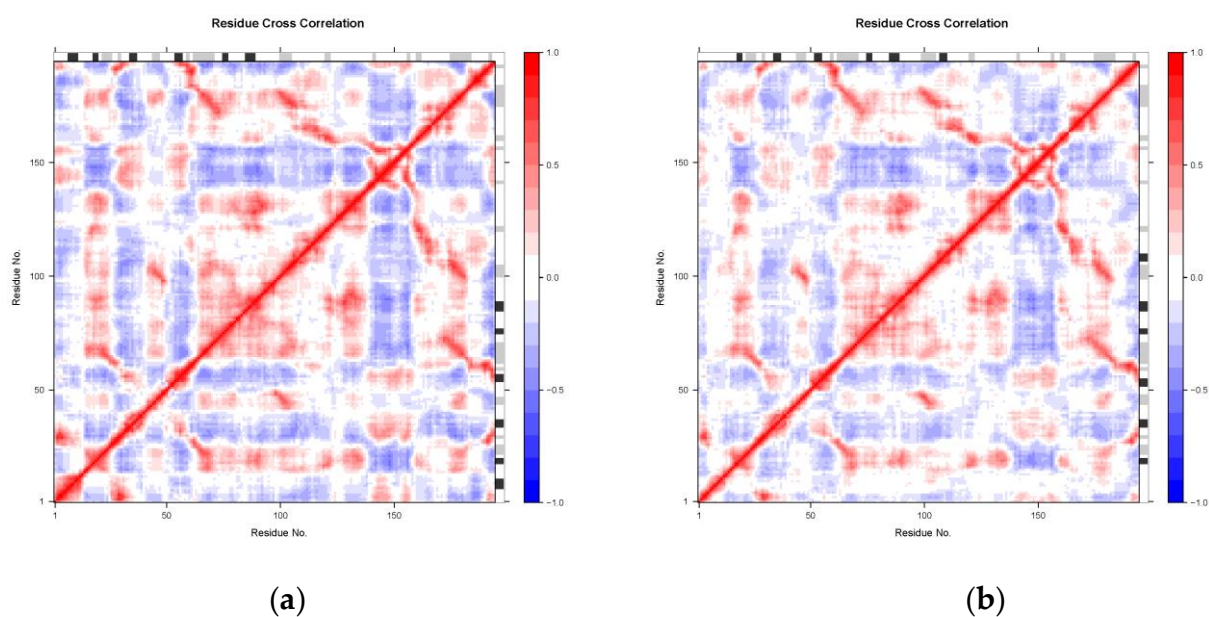

**Figure S13.** Dynamical residue cross-correlation map for the MD trajectory of the (a) binding process and (b) unbinding process of the receptor-ligand complex involving Salmeterol docked in SARS-CoV-2 B.1.1.7 RBD. PCA results for a trajectory with trajectory frames colored from blue to white to red in time order.

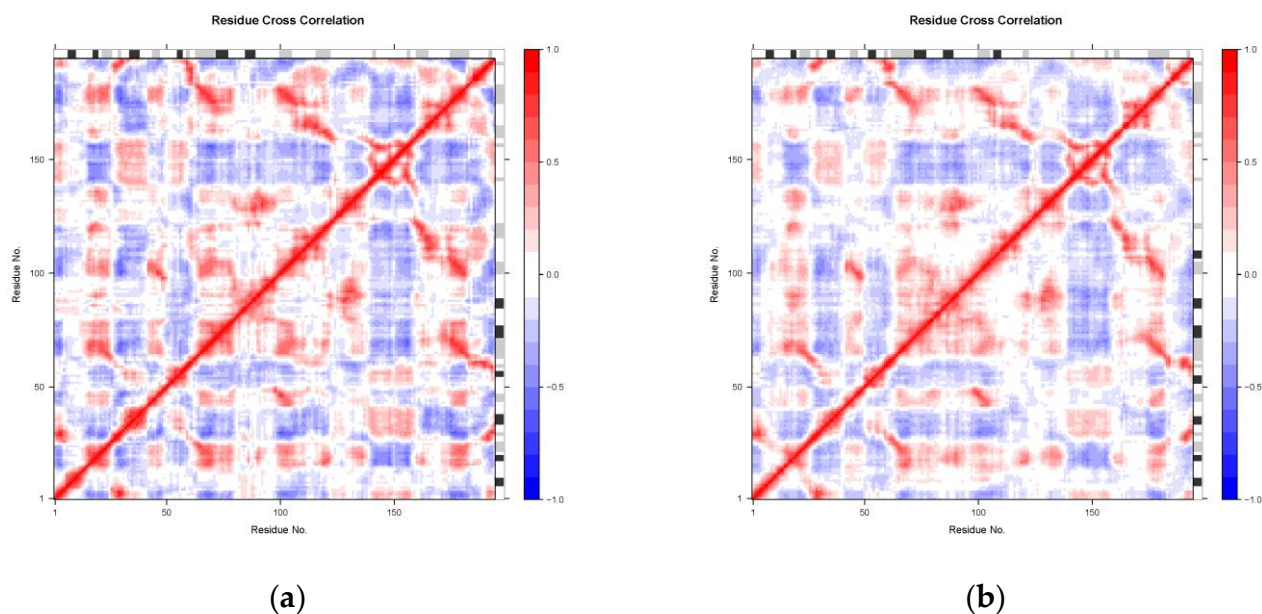

**Figure S14.** Dynamical residue cross-correlation map for the MD trajectory of the (a) binding process and (b) unbinding process of the receptor-ligand complex involving Salmeterol docked in SARS-CoV-2 B.1.351 RBD. PCA results for a trajectory with trajectory frames colored from blue to white to red in time order.

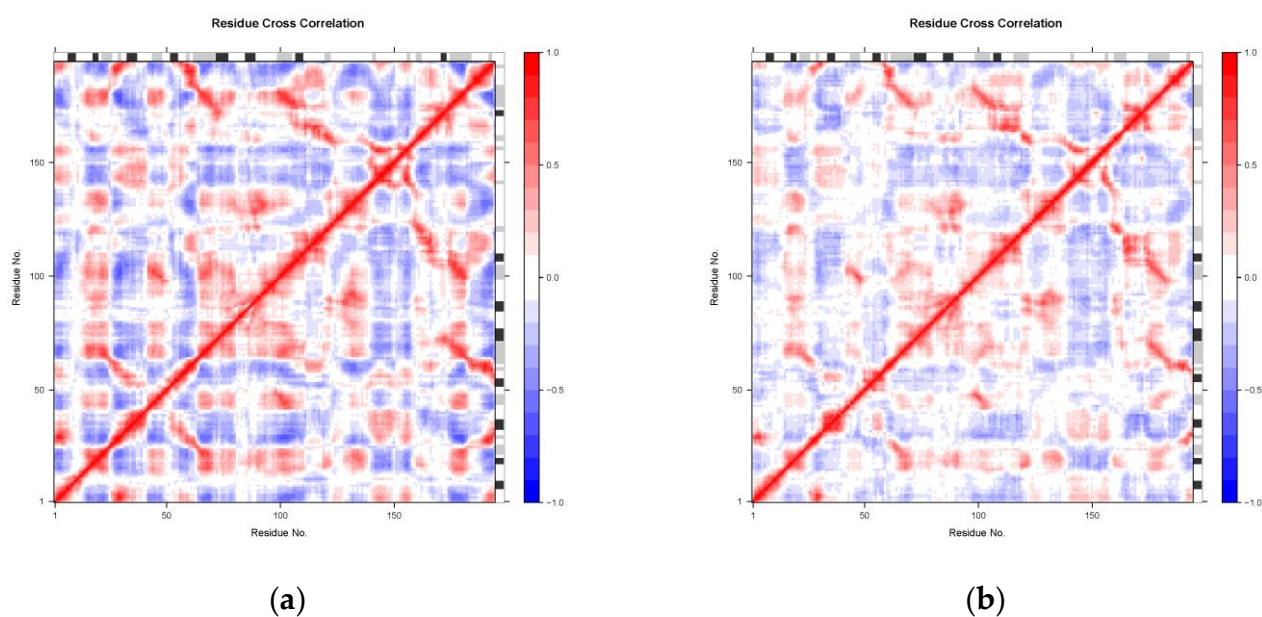

**Figure S15.** Dynamical residue cross-correlation map for the MD trajectory of the (a) binding process and (b) unbinding process of the receptor-ligand complex involving Salmeterol docked in SARS-CoV-2 P.1 RBD. PCA results for a trajectory with trajectory frames colored from blue to white to red in time order.
